1 Pontin/Reptin-associated complexes differentially impact plant development and viral  
2 pathology

3

4 Snigdha Chatterjee<sup>1,2,3</sup>, Min Xu<sup>4</sup>, Elena A. Shemyakina<sup>2,3</sup>, Jacob O. Brunkard<sup>1,2,3</sup>

5 <sup>1</sup>Laboratory of Genetics, University of Wisconsin – Madison, Madison, WI 53706, USA

6 <sup>2</sup>Department of Plant and Microbial Biology, University of California, Berkeley, Berkeley,  
7 CA 94720, USA

8 <sup>3</sup>Plant Gene Expression Center, USDA Agricultural Research Service, Albany, CA  
9 94710, USA

10 <sup>4</sup>Department of Biology, Northwest University, 710069 Xi'an, China

11

12 Corresponding author: [brunkard@wisc.edu](mailto:brunkard@wisc.edu) tel: (608)-890-4874

13

14

15 **Abstract:**

16 Pontin and Reptin are essential eukaryotic AAA+ ATPases that work together in  
17 several multiprotein complexes, contributing to chromatin remodeling and TARGET OF  
18 RAPAMYCIN (TOR) kinase complex assembly, among other functions. Null alleles of  
19 *pontin* or *reptin* are gametophyte lethal in plants, which has hindered studies of their  
20 crucial roles in plant biology. Here, we used virus-induced gene silencing (VIGS) to  
21 interrogate the functions of *Pontin* and *Reptin* in plant growth and physiology, focusing  
22 on *Nicotiana benthamiana*, a model species for the agriculturally significant *Solanaceae*  
23 family. Silencing either *Pontin* or *Reptin* caused pleiotropic developmental and  
24 physiological reprogramming, including aberrant leaf shape, reduced apical growth,  
25 delayed flowering, increased branching, chlorosis, and decreased spread of the RNA  
26 viruses *Tobacco mosaic virus* (TMV) and *Potato virus X* (PVX). To dissect these  
27 pleiotropic phenotypes, we took a comparative approach and silenced expression of key  
28 genes that encode subunits of each of the major Pontin/Reptin-associated chromatin  
29 remodeling or TOR complexes (*INO80*, *SWR-C/PIE1*, *TIP60*, *TOR*, and *TELO2*). We  
30 found that many of the *pontin/reptin* phenotypes could be attributed specifically to  
31 disruption of one of these complexes, with *tip60* and *tor* knockdown plants each  
32 phenocopying a large subset of *pontin/reptin* phenotypes. We conclude that  
33 Pontin/Reptin complexes are crucial for proper plant development, physiology, and  
34 stress responses, highlighting the multifaceted roles these conserved enzymes have  
35 evolved in eukaryotic cells.

36

37 **Key words:** Pontin (RuvBL1), Reptin (RuvBL2), INO80, SWR-C (PIE1), TIP60 (HAM1,  
38 HAM2), TARGET OF RAPAMYCIN (TOR, mTOR), chromatin remodeling, viral  
39 pathology

40

## 41 Introduction

42 Pontin and Reptin are deeply conserved eukaryotic AAA+ ATPases that form a  
43 heteromeric complex with diverse biological roles (Huen *et al.*, 2010; Rosenbaum *et al.*,  
44 2013; Dauden *et al.*, 2021). Clinical and mechanistic studies have implicated  
45 Pontin/Reptin in the metabolic and epigenetic regulation of various human diseases,  
46 including several cancers (Huber *et al.*, 2008; Flavin *et al.*, 2011; Osaki *et al.*, 2013;  
47 Mikesch *et al.*, 2018; Assimon *et al.*, 2019; Yan *et al.*, 2019; Armenteros-Monterroso *et*  
48 *al.*, 2019; Shin *et al.*, 2020; Lin *et al.*, 2020). Pontin/Reptin also contribute to human  
49 immune systems through roles in immune cell development and immunity signaling  
50 pathways (Arnold *et al.*, 2012; Hosokawa *et al.*, 2013; Zhang *et al.*, 2021). The  
51 importance of Pontin/Reptin to human health has prompted significant research effort to  
52 define their molecular functions, most of which can be broadly divided into two  
53 categories: (i) scaffolding chromatin remodeling complexes and (ii) co-chaperoning  
54 HSP90-mediated multiprotein complex assembly. In chromatin, Pontin/Reptin associate  
55 with the H2A/H2A.Z-substituting nucleosome remodeling complexes INO80 and SWR-1  
56 (Kobor *et al.*, 2004), with the histone H4 acetyltransferase TIP60 complex (Ikura *et al.*,  
57 2000; Jha *et al.*, 2008, 2013), and with telomerase (Venteicher *et al.*, 2008; Schořová *et*  
58 *al.*, 2019). Pontin/Reptin ATPase activity is apparently not required for many of their  
59 roles in chromatin remodeling (Yenerall *et al.*, 2020). In contrast, Pontin/Reptin  
60 complexes provide ATPase activity in their roles as co-chaperones for HSP90 in the  
61 R2TP (alias PAQosome) complex that promotes the assembly of functional snoRNPs  
62 (small nucleolar ribonucleoproteins) and PIKK (phosphatidylinositol kinase-like kinase,  
63 including TARGET OF RAPAMYCIN or TOR) complexes (Zhao *et al.*, 2008; Hořejší *et*  
64 *al.*, 2010; Boulon *et al.*, 2010; Kakahara & Houry, 2012; Kakahara *et al.*, 2014; Rivera-  
65 Calzada *et al.*, 2017; Martino *et al.*, 2018; Houry *et al.*, 2018; Maurizy *et al.*, 2018;  
66 Muñoz-Hernández *et al.*, 2019; Yenerall *et al.*, 2020; Coulombe *et al.*, 2020).

67 Evolutionarily, Pontin (aliases include RuvBL1, RVB1, and Tip49a) and Reptin  
68 (aliases include RuvBL2, RVB2, and Tip48/Tip49b) are distant homologues of the  
69 bacterial DNA-dependent ATPase RuvB, which participates in Holliday junction  
70 resolution. Within eukaryotes, Pontin and Reptin are remarkably conserved: to  
71 illustrate, Arabidopsis Pontin and Reptin are each ~90% similar and ~75% identical to

72 their human orthologues. Much less is known about Pontin/Reptin in plants than in  
73 humans, however. Pontin was identified in yeast two-hybrid screens as a protein  
74 interactor of Arabidopsis NOD-like receptors (NLRs) RPM1 and RPP2, which confer  
75 resistance to virulent strains of *Pseudomonas syringae* (bacteria) and *Peronospora*  
76 *parasitica* (oomycetes), respectively. The possible role of Pontin and Reptin in NLR-  
77 mediated disease resistance was not mechanistically established, although mildly  
78 decreasing *Pontin* expression did perturb development and enhance disease  
79 resistance. Pontin and Reptin were also identified in Arabidopsis telomerase  
80 complexes and are apparently required for telomere maintenance (Schořová *et al.*,  
81 2019).

82         Recently, we identified *Reptin* in a forward genetic screen for mutants with  
83 increased plasmodesmatal (PD) transport (Brunkard *et al.*, 2020). *pontin* and *reptin*  
84 knockouts are female gametophyte-lethal, but a weak allele of *reptin* (called *reptin-1* or  
85 *ise4*) carrying a missense mutation adjacent to the ATP-binding Walker A motif of the  
86 Reptin ATPase, A81V, can survive embryogenesis as a homozygote until the mid-  
87 torpedo stage, when development arrests under standard growing conditions.  
88 Subsequent transcriptomic and functional investigation of *reptin-1* revealed that Reptin  
89 is required for TOR activity in plants, and that TOR is a crucial regulator of cell-cell  
90 trafficking through PD (Brunkard *et al.*, 2020). PD are nanoscopic membrane-bound  
91 channels in plant cell walls that connect the cytosol of neighboring cells, transporting  
92 metabolites, signaling molecules, small RNAs, proteins up to ~80 kDa, and viruses  
93 between neighboring cells (Brunkard & Zambryski, 2017; Azim & Burch-Smith, 2020).  
94 TOR is a broadly conserved eukaryotic protein kinase in the atypical PIKK family that  
95 coordinates eukaryotic metabolism in complex with its conserved interacting partners,  
96 RAPTOR and LST8 (Valvezan & Manning, 2019; Liu & Sabatini, 2020; Brunkard, 2020).  
97 TOR complex (TORC1) assembly and stability is dependent on interaction with the  
98 Pontin/Reptin co-chaperone complex, R2TP (Hořejší *et al.*, 2010; Kim *et al.*, 2013;  
99 Brunkard *et al.*, 2020; Yenerall *et al.*, 2020; Pal *et al.*, 2021), and both Pontin and Reptin  
100 have been confirmed as strong interactors of the TOR complex in plants (Van Leene *et*  
101 *al.*, 2019).

102           The early lethality of even weak loss-of-function alleles of *pontin* and *reptin* has  
103 limited our understanding of the significance of these genes at later developmental  
104 stages. Here, we use post-embryonic gene silencing to define the pleiotropic  
105 phenotypes impacted by loss of Pontin and Reptin. Then, we systematically silence  
106 critical subunits of the various established Pontin/Reptin-interacting complexes,  
107 including TOR, TOR-associated TELO2, and chromatin remodelers INO80, SWR1/PIE,  
108 and TIP60, and compare these phenotypes to the *pontin/reptin* knockdowns. We  
109 discover that Pontin and Reptin influence a broad range of plant phenotypes, including  
110 many unanticipated effects on morphology, physiology, flowering time, and pathogen  
111 defense, and, through comparison, hypothesize that most of these phenotypes can be  
112 explained by disruption of specific Pontin/Reptin-associated complexes. These findings  
113 substantially advance our understanding of the evolution of Pontin/Reptin biology in  
114 eukaryotes.  
115

## 116 **Materials and Methods**

117 **Plant Materials and Growth Conditions.** *N. benthamiana* Nb-1 and *A. thaliana* Col-0  
118 plants were grown under standard conditions with 16-h day/8-h night at  $\sim 120 \mu\text{mol}$   
119 photons  $\text{m}^{-2} \text{s}^{-1}$  of photosynthetically active radiation. The reference Nb-1 genotype  
120 obtained from the Boyce Thompson Institute was used for all experiments (Bombarely  
121 *et al.*, 2012).

122 **Molecular Cloning and TRV-mediated VIGS.** Virus-induced gene silencing (VIGS)  
123 vectors were prepared as previously described (Brunkard *et al.*, 2015; Horner &  
124 Brunkard, 2021), using oligonucleotides listed in Supplementary Table S1. RNA was  
125 isolated from Nb-1 shoots with the Spectrum Plant Total RNA (Sigma-Aldrich). cDNA  
126 was synthesized from RNA using random hexamers and SuperScript III reverse  
127 transcriptase (Fisher Scientific). Silencing triggers were amplified with Phusion DNA  
128 polymerase (New England Biolabs), digested alongside pYL156 with restriction  
129 enzymes as listed in Supplementary Table S1 (enzymes from New England Biolabs),  
130 and ligated with Promega T4 DNA ligase (Fisher Scientific). Ligations were transformed  
131 into house-made chemically competent XL1-Blue *Escherichia coli*. Kanamycin-resistant  
132 bacterial colonies were screened by colony PCR for positive clones. Plasmids were  
133 then minipreped (Bioneer) and Sanger sequenced to confirm insert sequences.  
134 Manufacturer's protocols were followed throughout. All constructs were then  
135 transformed into *Agrobacterium tumefaciens* GV3101 for plant transformation. Three  
136 week old plants were used for VIGS as previously described (Horner & Brunkard, 2021).  
137 The first true leaves were agroinfiltrated, with TRV::*GUS* as a negative ("mock") control  
138 and TRV::*PDS* as a positive control to visually track silencing efficiency. Silencing was  
139 consistently observed within 14 days post-VIGS infiltration.

140

141 **Chlorophyll extraction.** Chlorophylls were extracted as previously described (Müller-  
142 Moulé *et al.*, 2002). Briefly, three leaf punches per leaf were collected, flash frozen in  
143 liquid nitrogen, and then the frozen leaf punches were then ground with a plastic pestle.  
144 100  $\mu\text{L}$  of 100% acetone was then added, vortexed, and centrifuged at full speed for 1  
145 min. This was step was done twice. 5 $\mu\text{L}$  of the resulting supernatant was taken and

146 added to 995 $\mu$ L of cold, 80% acetone, vortexed, and centrifuged. Quantification was  
147 done using a spectrophotometer at 664nm for chlorophyll a and at 647 for chlorophyll b.

148

149 **Pathogen Inoculation.** Four week old plants were used for all virus inoculations. One  
150 lower leaf per plant was syringe infiltrated with fresh overnight cultures of *Agrobacterium*  
151 resuspended in infiltration media (10 mM MgCl<sub>2</sub>, 10 mM MES, and 200  $\mu$ M  
152 acetosyringone, pH 5.6) to a final OD<sub>600nm</sub> = 0.5. Three *Agrobacterium* cultures were  
153 used that carried T-DNA encoding either TMV-GFP (Liu *et al.*, 2002; Burch-Smith *et al.*,  
154 2012), PVX-GFP (Peart *et al.*, 2002), or a mock control. All plants were photographed  
155 seven days post agroinfiltration under a long wave UV lamp (100 watt, 365 nm, 115V-  
156 60Hz).

157

158 **Protein Extraction and Western Blot Assays.** Leaves from VIGS plants infected with  
159 TMV-GFP were collected and snap frozen in liquid nitrogen. Protein was extracted from  
160 leaves in 100 mM MOPS (pH 7.6), 100 mM NaCl, 5% SDS, 0.5%  $\beta$ -mercaptoethanol,  
161 10% glycerin, 2 mM PMSF, and 1 $\times$  PhosSTOP phosphatase inhibitor (Sigma-Aldrich).  
162 Specific protein levels were assayed by Western blot protein using primary antibodies  
163 against GFP (Santa Cruz SC-9996) along with an HRP-conjugated goat anti-mouse IgG  
164 secondary antibody (Sigma Aldrich A4416). Total protein was visualized after transfer  
165 using Ponceau S red staining. All Western blot experiments were repeated at least  
166 three times, with representative results shown.

167

168 **RNA-seq.** Tissue for RNA-seq was collected from TRV::*AtReptin*, TRV::*AtTIP60*, or  
169 mock-treated TRV::*GUS* plants 2 weeks post-infiltration with *Agrobacterium* cultures  
170 harboring the TRV binary vectors (Burch-Smith *et al.*, 2006). Plant leaves were collected  
171 and immediately frozen in liquid nitrogen. Total RNA was extracted using Trizol Reagent  
172 (Invitrogen, USA) from *N. benthamiana* leaves according to the manufacturer's  
173 recommendations. Three pools of RNA from three individuals were prepared for the  
174 collections. RNA pools were made by combining 333.3 ng of RNA from each individual.  
175 Illumina TruSeq Stranded Total RNA kit with Ribo-Zero Plant was used to prepare  
176 libraries for RNA sequencing. Libraries were sequenced at the Vincent J. Coates

177 Genomics Laboratory (QB3, Berkeley) using an Illumina Hi-Seq 4000 platform (150-bp  
178 paired-end run) and analyzed as previously described (Scarpin *et al.*, 2020). Reads  
179 were aligned with HISAT2 and counted with HTseq (Anders *et al.*, 2015; Kim *et al.*,  
180 2015). Differential transcript abundance was determined with DESeq2 (Love *et al.*,  
181 2014). Transcriptomes were further analyzed with Mapman software (Thimm *et al.*,  
182 2004). Significantly affected gene categories were determined by MapMan using a  
183 Wilcoxon rank-sum test with the Benjamini-Hochberg-Yekutieli procedure to correct for  
184 the false discovery rate (Thimm *et al.*, 2004).

185

### 186 **Growth and development analyses of TRV-VIGS plants**

187 Shoot phenotypes of plants infected with TRV carrying silencing triggers was performed  
188 as previously described (Busche *et al.*, 2021). Phenotypes were analyzed 2 weeks  
189 after agroinfiltrating to initiate VIGS, including counting branch number and quantifying  
190 chlorophyll levels. All pictures of leaf series were taken 2 weeks post VIGS. Flowering  
191 time data is reported for plants after plants flowered.

192



## 193 **Results**

### 194 **Silencing *Reptin* or *Pontin* cause pleiotropic defects in shoots**

195 We used a *Tobacco rattle virus* (TRV) VIGS system as a reverse genetics tool to  
196 knockdown *Pontin* and *Reptin* expression in *N. benthamiana* plants. Throughout, we  
197 used a mock silencing construct containing a fragment of the bacterial *GUS* gene  
198 (TRV::*GUS*) as a negative control and a silencing construct containing a fragment of the  
199 phytoene desaturase gene, *PDS* (TRV::*PDS*), as a positive control to confirm VIGS  
200 efficiency. Silencing *Pontin* or *Reptin* drastically decreased plant growth and caused  
201 pleiotropically aberrant leaf shape (Figure 1a & 1c). *Pontin* and *Reptin* knockdowns also  
202 displayed chlorotic leaves (Figure 1a). To quantify this phenotype, we extracted  
203 pigments from silenced leaves and measured total chlorophyll a and b  
204 spectrophotometrically. TRV::*Reptin* and TRV::*Pontin* plants accumulated significantly  
205 less amounts of both chlorophyll a and b, when compared to mock-treated plants ( $n = 9$   
206 ,  $p < 10^{-3}$ , Student's *t*-test) (Figure 1b).

207 Since silencing *Pontin* and *Reptin* decreased growth in plants, we decided to  
208 count the number of emerged, expanding leaves starting soon after the onset of VIGS  
209 (two weeks after agroinfiltration) and again two weeks later to determine if these genes  
210 are required for leaf initiation and/or expansion. Mock-treated plants made  $10.0 \pm 0.2$   
211 leaves on average during the two weeks after agroinfiltration, whereas TRV::*Reptin*  
212 plants made only  $5.0 \pm 0.1$  leaves and TRV::*Pontin* plants made only  $6.7 \pm 0.1$  leaves,  
213 on average ( $n \geq 51$ ,  $p < 10^{-3}$ , *t*-test). We went on to count leaves on the primary shoot  
214 every other day for the next 2 weeks. Whereas mock plants went on to make  $15.2 \pm 0.1$   
215 leaves on average 4 weeks post VIGS, TRV::*Reptin* and TRV::*Pontin* knockdown plants  
216 went on to make only  $6.4 \pm 0.2$  and  $8.5 \pm 0.2$  leaves, respectively ( $p < 10^{-3}$ ) (Figure 1d).  
217 The transition from vegetative to reproductive development was also delayed by  
218 silencing *Pontin* and *Reptin*. TRV::*Pontin* and TRV::*Reptin* plants flowered two or more  
219 weeks later than mock-treated plants, and many TRV::*Pontin* and TRV::*Reptin*  
220 knockdowns did not flower at all during our 4-week observation period. Despite reduced  
221 overall shoot growth, *Reptin*- and *Pontin*- silenced plants also made more branches  
222 when compared to mock-treated plants (Figure 1e).

223 We knocked down *Reptin* and *Pontin* in *Arabidopsis thaliana* and observed  
224 similar phenotypes. TRV::*AtReptin* and TRV::*AtPontin* plants were also smaller in size  
225 and displayed chlorosis, confirming that the effects of silencing *Reptin* and *Pontin* are  
226 not unique to *N. benthamiana* or its close asterid relatives. Importantly, in both species,  
227 TRV::*Pontin* plants were phenotypically indistinguishable from TRV::*Reptin* plants,  
228 suggesting that Reptin and Pontin's impacts on plant development and physiology are  
229 largely (if not wholly) due to their roles as a heteromeric ATPase complex, rather than  
230 any independent functions as homomers.

231

### 232 **Silencing *TIP60* phenocopies many effects of knocking down *Pontin/Reptin***

233 To parse the phenotypes that we observed in TRV::*Reptin* and TRV::*Pontin*  
234 plants, we next used VIGS to knockdown expression of the genes that encode catalytic  
235 subunits of Pontin/Reptin-associated chromatin remodeling complexes, including  
236 *INO80*, *PIE1*, and *TIP60*. *INO80* and *PIE1* are involved in the replacement of  
237 H2A/H2A.Z/H2B dimers (Figure 2a), and mutants in *ino80* and *pie1* have been  
238 previously described in *A. thaliana* (Noh & Amasino, 2003; Fritsch *et al.*, 2004; March-  
239 Díaz *et al.*, 2008; Zhang *et al.*, 2015). *TIP60* is a histone acetyltransferase (Figure 2a),  
240 also known as HAM1/HAM2 in *A. thaliana*; *TIP60* knockouts are female gametophyte  
241 lethal in *A. thaliana* (Latrasse *et al.*, 2008). Like *Reptin* and *Pontin* knockdowns,  
242 TRV::*NbTIP60* plants showed chlorotic leaves, which was confirmed by significantly  
243 lower quantities of chlorophyll a and chlorophyll b when compared to the mock-treated  
244 plants ( $n = 9$ ,  $p = 10^{-5}$  and  $p = 0.003$ ) (Figure 2c). TRV::*NbTIP60* plants also make less  
245 leaves compared to mock plants, about  $6.0 \pm 0.1$  leaves on average, much like the  
246 Reptin and Pontin knockdowns ( $n \geq 49$ ) (Figure 2b & 2d).

247 In contrast, neither TRV::*NbINO80* nor TRV::*NbPIE1* plants showed visible signs  
248 of chlorosis, and we did not detect any statistically significant change in chlorophyll a or  
249 b accumulation in the leaves of these plants ( $n = 9$ ,  $p > 0.09$ ) (Figure 2c). TRV::*NbINO80*  
250 and TRV::*NbPIE1* plants also did not show any difference in the number of leaves they  
251 developed compared to the mock plants (Figure 2b & d). Previous work suggested that  
252 *ino80* mutants display a mild increased branching phenotype in *A. thaliana* (Fritsch *et*  
253 *al.*, 2004). Similarly, TRV::*NbINO80* plants produced more branches ( $5.3 \pm 0.3$

254 branches) than TRV::*GUS* mock plants ( $0.6 \pm 0.1$  branches,  $n \geq 51$ ,  $p = 10^{-8}$ ), similar to  
255 TRV::*Reptin* and TRV::*Pontin* plants (Figure 2e). A screen for early flowering  
256 phenotypes identified *pie1* mutants in *A. thaliana* (Noh & Amasino, 2003), which led us  
257 to investigate TRV::*PIE1* flowering time. Indeed, knocking down *PIE1* in *N.*  
258 *benthamiana* causes the plants to flower  $9 \pm 0.2$  days earlier than mock plants ( $n \geq 51$ ,  
259  $p < 10^{-3}$ , Student's *t*-test) (Figure 2f). This phenotype contrasts with the late flowering  
260 phenotype of TRV::*Reptin* and TRV::*Pontin* plants.

261

### 262 **Silencing *TOR* disrupts growth, similar to silencing *Pontin* and *Reptin***

263 Since *Reptin* and *Pontin* play a role in stabilizing the TORC1 dimer as integral  
264 members of the R2TP complex, we next used VIGS to knockdown *TOR* and another  
265 TOR-interacting co-chaperone, *TELO2*, to see if those genes could contribute to the  
266 pleiotropic phenotypes of *Reptin* and *Pontin* knockdowns. *TELO2* is part of the TTT  
267 complex that contributes to the stabilization of TORC1 alongside R2TP (Figure 3a)  
268 (Takai *et al.*, 2007, 2010; Garcia *et al.*, 2017; Pal *et al.*, 2021). TRV::*NbTELO2* plants  
269 showed no apparent chlorosis and did not have significantly different accumulation of  
270 chlorophyll a or b compared to mock-treated plants (Figure 3c). Knocking down *TELO2*  
271 does not have strong impacts on plant growth and development, including leaf initiation  
272 rates, since the plants made  $7.6 \pm 0.1$  leaves. ( $n \geq 51$ ,  $p = 0.1$ ) (Figure 3b & 3d).  
273 Knocking down *TOR*, however, significantly decreased chlorophyll a and b  
274 accumulation by 34% for chlorophyll a and by 26% for chlorophyll b ( $n = 9$ ,  $p < 0.002$ )  
275 (Figure 3c). TRV::*NbTOR* plants also showed severe dwarfism and made significantly  
276 fewer leaves compared to mock plants 2 weeks post VIGS ( $n \geq 51$ ,  $p < 10^{-16}$ ) and four  
277 weeks post VIGS ( $p < 10^{-20}$ ), much like the *Reptin* and *Pontin* knockdowns (Figure 3b &  
278 d). Therefore, disruption of TOR signaling could contribute to several of the pleiotropic  
279 phenotypes of TRV::*Reptin* and TRV::*Pontin* plants.

280

### 281 **Silencing *Reptin*, *Pontin*, *TIP60*, or *TOR* restricts TMV infection**

282 Pontin was first identified in plants as an interacting partner of *Arabidopsis*  
283 *thaliana* disease resistance proteins RPM1 and RPP5, which are both NOD-like  
284 nucleotide-binding leucine-rich-repeat receptors (NLRs), but differ in their N-terminal

285 structure, which is either a coiled-coil domain (CC) or a Toll/Interleukin-1 Repeat-like  
286 domain (TIR), respectively (Whitham *et al.*, 1994; Grant *et al.*, 1995; Parker *et al.*, 1997;  
287 Holt *et al.*, 2002). The mechanistic relationship between Pontin/Reptin and the NLRs  
288 remains unclear, but *Pontin* knockdown plants exhibited increased resistance to the  
289 oomycete pathogen *Hyaloperonospora parasitica* (Holt *et al.*, 2002). Here, we tested  
290 whether knocking down *Pontin/Reptin* affects viral infection in plants. A *Tobacco*  
291 *mosaic virus* (TMV) strain expressing GFP was introduced into plants by agroinfiltration,  
292 and infection was tracked by UV-excited GFP fluorescence and by extracting protein  
293 from shoot apices and probing for viral GFP accumulation with  $\alpha$ -GFP antibodies. By  
294 both methods, we observed that TMV movement was drastically restricted in  
295 TRV::*Reptin* and TRV::*Pontin* plants in contrast to mock plants ( $n \geq 30$ ) (Figure 4a and  
296 4b). To determine whether this effect was specific to TMV or a more broad effect, we  
297 next infected plants with an unrelated RNA virus, *Potato virus X* (PVX), tagged with  
298 GFP. PVX-GFP infection was also strongly restricted in TRV::*Pontin* and TRV::*Reptin*  
299 plants (Supplementary Figure S1).

300 Given the disrupted growth and enhanced resistance to viral infections of  
301 *pontin/reptin* knockdowns, we hypothesized that stress responses might be generally  
302 upregulated in these plants. Indeed, using RNA-Seq, we observed significant and  
303 broad induction of biotic stress/immune signaling response genes in *reptin* knockdown  
304 plants, which suggests that constitutive activation of the plant immune system might be  
305 responsible for the restriction of TMV and PVX spread in TRV::*Reptin* plants (Figure 4c,  
306 Supplementary Tables S2, S3). Incidentally, we had not observed any significant  
307 induction of biotic stress response genes in the *reptin-1* mid-torpedo stage embryo  
308 transcriptome (Brunkard *et al.*, 2020), which could be due to the different developmental  
309 stage or could suggest that this weak, partial loss-of-function allele of *reptin* has distinct  
310 effects on plant physiology from complete silencing of the *Reptin* gene.

311 We next tested whether the Pontin/Reptin-associated chromatin remodeling  
312 complexes might influence viral infections. We found that knocking down *INO80* or  
313 *PIE1* had no discernible effect on TMV or PVX infection, but that silencing *TIP60*  
314 delayed viral spread similarly to the restricted infections in TRV::*Pontin* and TRV::*Reptin*  
315 plants (Figure 4a). Since TMV and PVX are RNA viruses that replicate in the

316 cytoplasm, and TIP60 is a chromatin-associated complex, the effects of TIP60 histone  
317 acetyltransferase activity on viral spread are most likely indirect due to changes in  
318 nuclear gene expression. Indeed, knocking down *TIP60* induced widespread expression  
319 of biotic stress response genes that could contribute to the restriction of TMV and PVX  
320 infection, correlating with the induction of biotic stress response genes in *Reptin*  
321 knockdown plants (Figure 4c).

322 Finally, we tested whether loss of TOR and/or TELO2 activity could contribute to  
323 the restricted viral spread in TRV::*Reptin* and TRV::*Pontin* plants. TOR activity is  
324 required for the replication and spread of many human pathogenic viruses (including  
325 coronaviruses (Zhou *et al.*, 2020; Karam *et al.*, 2021; Mullen *et al.*, 2021), herpesviruses  
326 (Chuluunbaatar *et al.*, 2010; Moorman & Shenk, 2010), and many more) and has been  
327 implicated in the replication of another family of plant RNA viruses, the potyviruses  
328 (Ouibrahim *et al.*, 2015). As with the other developmental and physiological  
329 phenotypes, knocking down *TELO2* had no discernable effect on TMV or PVX infection  
330 (Figure 4a). Silencing *TOR*, however, strongly prevented TMV and PVX spread, much  
331 like silencing *Reptin*, *Pontin*, and *TIP60* (Figure 4a). This experiment does not  
332 distinguish between direct effects of TOR signaling on TMV or PVX replication and  
333 spread versus indirect effects due to induction of biotic stress responses, although we  
334 should note that our previous work demonstrated that inhibiting TOR induces biotic  
335 stress responses in *Arabidopsis* (Scarpin *et al.*, 2020). Thus, we conclude that silencing  
336 TOR broadly restricts plant RNA viral spread, most likely by disrupting growth and  
337 broadly inducing biotic stress responses.

338

## 339 **Discussion**

340 In this work, we interrogated the roles of the essential AAA+ ATPases *Reptin* and  
341 *Pontin* in post-embryonic plant development and physiology using a genetic knockdown  
342 approach, VIGS. We and others have previously used VIGS to investigate the role of  
343 essential genes that are required to survive embryogenesis and/or gametophyte  
344 development (Teresa Ruiz *et al.*, 1998; Stonebloom *et al.*, 2009; Burch-Smith &  
345 Zambryski, 2010; Ahn *et al.*, 2011; Brunkard *et al.*, 2020). Whereas silencing many  
346 embryo-lethal genes, including the regulators of plasmodesmatal transport *ISE1*, *ISE2*,

347 and *ISE3*, causes relatively mild phenotypes (e.g., partial chlorosis, slightly reduced  
348 growth), silencing *Reptin* (alias *ISE4*) or *Pontin* causes severe, pleiotropic defects. This  
349 finding reflects the essential roles these genes play throughout the plant life cycle. To  
350 parse these pleiotropic phenotypes, we took a reverse genetic approach by silencing  
351 key components of several established Pontin/Reptin-associated complexes, namely  
352 the nuclear chromatin remodelers INO80, PIE1/SWR1, and TIP60 and the cytosolic  
353 metabolism-regulating complexes R2TP, TTT, and TORC1. Broadly, we found that  
354 most of the *pontin* and *reptin* knockdown phenotypes could be phenocopied by silencing  
355 one of these interactors.

356 The most severe phenotypes, including delayed leaf initiation rates, chlorosis,  
357 and severely misshapen leaf development, were consistently observed in *pontin*, *reptin*,  
358 *tip60*, and *tor* knockdowns. Unexpectedly, we did not observe similarly severe  
359 phenotypes in *telo2* knockdowns, although *telo2* is also essential for plant  
360 embryogenesis (Garcia *et al.*, 2017). Indeed, loss of many apparently important  
361 interacting partners of TOR, including the R2TP subunit Spaghetti (Brunkard *et al.*,  
362 2020), the TORC1 subunit LST8 (Moreau *et al.*, 2012), and (as we show here) the TTT  
363 subunit TELO2, do not disrupt growth and development anywhere near as severely as  
364 disrupting TOR itself. Even in well-studied biomedical models, including yeast and  
365 human cell lines, some of these interactors are only conditionally required to maintain or  
366 support TORC1 activity; for example, mLST8, which is consistently found in the  
367 mTORC1 complex in wild-type cells, is apparently partially or wholly dispensable for  
368 mTORC1 activity under most circumstances (Guertin *et al.*, 2006; Hwang *et al.*, 2019).  
369 Multifaceted functional genetics approaches, including analysis of heritable mutations,  
370 acute gene silencing (e.g., VIGS), and chemical genetics, will be useful to determine  
371 how these genes contribute to metabolic regulation in response to environmental cues.

372 Strikingly, *pontin* and *reptin* knockdowns are phenotypically indistinguishable,  
373 which supports the prevailing hypothesis that Pontin and Reptin exclusively or, at least,  
374 most crucially function in a heteromeric ATPase complex. One of these genes cannot  
375 compensate for loss of the other, despite their remarkable similarity to each other and  
376 shared evolutionary origins as paralogous orthologues of bacterial RuvB. Although we  
377 were able to copy some of the *pontin* and *reptin* knockdown phenotypes by silencing

378 their established interacting partners, none of these other knockdowns fully  
379 phenocopied the severity of *pontin/reptin*. One hypothesis to explain this result would  
380 be that the concerted loss of all of Pontin and/or Reptin's functions is synergistically  
381 required to match the *pontin/reptin* knockdown phenotypes. Alongside this hypothesis,  
382 it remains likely that the full range of Pontin/Reptin functions in plant cells is not yet  
383 established. Ongoing efforts to directly define the molecular functions of these proteins  
384 directly in plants, rather than by orthology to conserved eukaryotic functions, could  
385 illuminate new or repurposed roles for the Pontin/Reptin ATPases in plants and explain  
386 some of the remaining pleiotropic phenotypes we observed.

387 Pontin/Reptin were first studied in plants following their discovery in a yeast two-  
388 hybrid screen for interactors of nucleotide-binding leucine-rich repeat (NB-LRR) NOD-  
389 like receptors (NLRs) that confer disease resistance in plants (Holt *et al.*, 2002).  
390 Although NLRs are typically activated in response to a limited range of specific  
391 pathogens (often only a subset of strains within a species), this early report found that  
392 slightly reducing *Pontin/Reptin* expression conferred resistance to at least some  
393 oomycete and bacterial pathogens. Here, we found that *pontin* and *reptin* knockdowns  
394 are much more resistant to viral pathogens as well, which we demonstrated with two  
395 unrelated RNA viruses, TMV and PVX. Moreover, transcriptomic analysis of *reptin*  
396 knockdowns confirmed that biotic stress responses are broadly induced in these plants,  
397 which would support the hypothesis that the Pontin/Reptin complex is required to limit  
398 spurious activation of the plant immune system. We also found that biotic stress  
399 responses are constitutively induced in *tip60* knockdowns, and *tip60* plants are  
400 accordingly also resistant to TMV and PVX. As with several other phenotypes,  
401 however, *tor* knockdowns shared similar phenotypes to *tip60*, *pontin*, and *reptin*, limiting  
402 spread of TMV and PVX. We recently showed that reducing TOR activity activates  
403 biotic stress responses, so this effect is also unlikely to be specific to just these two  
404 viruses, but instead an indication that silencing *tor* confers resistance to diverse  
405 pathogens. Indeed, another report using RNA interference to partially suppress *TOR*  
406 expression rice showed that *tor* knockdowns are also more resistant to the bacterial  
407 pathogen *Xanthomonas oryzae* (De Vleeschauwer *et al.*, 2018) Therefore, while we  
408 cannot propose a single mechanism by which knocking down *pontin* and/or *reptin*

409 confers resistance to oomycetes, bacteria, and viruses, we do argue that these effects  
410 can be explained by disruption of either TIP60 or TOR activities, and are therefore not  
411 dependent of the previously observed protein-protein interactions between  
412 Pontin/Reptin and NLRs *in vitro* and in yeast.

413 In conclusion, this report demonstrates that *Pontin* and *Reptin* are crucial,  
414 multifunctional genes that impact a range of phenotypes in plants. Given the growing  
415 interest in Pontin and Reptin for their roles in human health, a deeper understanding of  
416 the evolutionary conservation of roles for Pontin/Reptin in cells, as well as the possible  
417 exaptation of new functions for these proteins in distinct lineages, could illuminate new  
418 lines of inquiry for the biomedical research community. More immediately, our results  
419 demonstrate that VIGS can be used to determine roles for gametophyte-lethal genes in  
420 postembryonic development and that comparative impacts of VIGS on multiple essential  
421 genes can be used to begin parsing how pleiotropic phenotypes are caused by  
422 disruption of promiscuous protein complexes.

423

424



425 **Supplementary data**

426

427 Figure S1. Plants infected with PVX-GFP, shown as for TMV-GFP infections in Figure

428 4a.

429 Table S1. Oligonucleotide primers used in this study.

430 Table S2. RNA-Seq results for TRV::*Reptin* and TRV::*TIP60*.

431 Table S3. Significant MapMan gene ontologies of TRV::*Reptin* and TRV::*TIP60* RNA-

432 Seq.

433

434 **Author Contributions**

435 SC, MX, EMS, and JOB conceived the project, designed the experiments, performed  
436 the experiments, and analyzed data. SC and JOB wrote the manuscript.

437

438 **Funding**

439 This project was supported by NIH grant DP5-OD023072 to J.O.B. and an NSF  
440 graduate research fellowship to S.C. This work used the Vincent J. Coates Genomics  
441 Sequencing Laboratory at UC Berkeley for Illumina sequencing (supported by NIH grant  
442 S10-OD018174).

443

444 **Acknowledgments**

445 We thank Patricia Zambryski, M. Regina Scarpin, Michael Busche, Cynthia Amstutz,  
446 Samuel Leiboff, Tessa Burch-Smith, Barbara Baker, and Jeffrey Tung for reagents and  
447 support with conducting and designing experiments.

448

449 **Data availability**

450 RNA-Seq sequencing data were deposited with NCBI, bioproject ID PRJNA736936.

451

452 **Figure 1.** Silencing *Pontin* or *Reptin* causes comparable pleiotropic defects in shoot  
453 growth, development, and physiology. **(a)** Representative images of mock-treated  
454 (TRV::*GUS*) plants compared to TRV::*Reptin* and TRV::*Pontin* plants four weeks after  
455 initiating VIGS. **(b)** Knocking down *Reptin* or *Pontin* expression significantly decreases  
456 chlorophyll a and chlorophyll b content in leaves ( $n = 9$ ,  $p < 10^{-3}$ , Student's *t*-test). Blue  
457 bars (left) indicate chlorophyll a levels, gray bars (right) indicate chlorophyll b levels. **(c)**  
458 TRV::*Reptin* and TRV::*Pontin* plants make fewer leaves with aberrant leaf shapes.  
459 Silhouettes are representative images taken from a leaf series of a single plant, with the  
460 first leaf that showed effects of silencing on the left and subsequent leaves ordered from  
461 oldest to youngest. **(d)** Leaf numbers were quantified 14 and 28 days after infiltrating  
462 with VIGS constructs. TRV::*Reptin* and TRV::*Pontin* plants made significantly fewer  
463 leaves than mock-treated (TRV::*GUS*) plants. **(e)** Lateral branches were counted for  
464 mock-treated (TRV::*GUS*), TRV::*Reptin*, and TRV::*Pontin* plants. Whereas most mock  
465 plants extended no or very few branches, TRV::*Reptin* and TRV::*Pontin* plants extended  
466 branches from a large number of axillary buds.

467  
468 **Figure 2.** Silencing expression of *Pontin/Reptin*-associated chromatin remodeling  
469 complexes partially phenocopies TRV::*Reptin* and TRV::*Pontin* phenotypes. **(a)**  
470 Functional summary of the *Pontin/Reptin*-associated chromatin remodeling complexes  
471 targeted for silencing in this study. PIE1 and INO80 participate in exchanging H2A and  
472 H2A.Z subunits in nucleosomes, which can impact gene expression. TIP60 is an  
473 acetyltransferase that acetylates histone H4, which typically promotes gene  
474 transcription. **(b)** Representative leaf phenotypes of TRV::*TIP60*, TRV::*INO80*, and  
475 TRV::*PIE1* are shown as described in Figure 1a. TRV::*TIP60* somewhat disrupts leaf  
476 size and shape, whereas TRV::*INO80* and TRV::*PIE1* plants are largely similar to mock-  
477 treated (TRV::*GUS*) plants. **(c)** Leaf chlorophyll levels were measured for each silenced  
478 plant. Chlorophyll a (left, blue bars) and chlorophyll b (right, gray bars) concentrations  
479 are significantly reduced in TRV::*TIP60*, to similar levels as observed in TRV::*Reptin*  
480 and TRV::*Pontin* plants. TRV::*INO80* and TRV::*PIE1* plants showed no significant  
481 changes in chlorophyll levels. **(d)** Leaf numbers were tracked as described in Figure  
482 1d. TRV::*TIP60* made significantly fewer leaves than mock-treated plants, similar to

483 TRV::*Reptin* and TRV::*Pontin* plants. TRV::*INO80* and TRV::*PIE1* had no significant  
484 effect on leaf emergence rates. **(e)** TRV::*INO80* phenocopied the increased branching  
485 phenotype observed in TRV::*Reptin* and TRV::*Pontin* plants. Silencing *PIE1* and *TIP60*  
486 had no significant effect on branching in our experiments. **(f)** TRV::*PIE1* plants flowered  
487 significantly earlier than mock-treated (TRV::*GUS*) plants, similar to the early-flowering  
488 phenotype of *pie1* mutants in *A. thaliana*. In contrast, TRV::*Reptin* and TRV::*Pontin*  
489 plants rarely flowered during our observation period.

490

491 **Figure 3.** Silencing *TOR*, but not *TELO2*, severely disrupts plant growth and  
492 development with similar phenotypes to *pontin* and *reptin* knockdowns. **(a)** R2TP and  
493 TTT complexes are proposed to work in concert to assemble and/or stabilize the active  
494 TORC1 heterodimeric complex, as shown. **(b)** Shoot and leaf phenotypes for  
495 representative silenced plants, as described for Figure 1c. Silencing *TELO2* has  
496 minimal effects on leaf size and shape, whereas silencing *TOR* drastically reduces  
497 growth and causes aberrant leaf shapes, with phenotypes as severe as in TRV::*Reptin*  
498 and TRV::*Pontin* plants. **(c)** Chlorophyll levels are shown as in Figure 1b. Silencing  
499 *TOR* significantly reduces chlorophyll concentrations in leaves, but silencing *TELO2* has  
500 no significant effect. **(d)** Leaf initiation is not disrupted by silencing *TELO2*, but is  
501 almost completely arrested in TRV::*TOR* plants (panel as in Figure 1d).

502

503 **Figure 4.** Pontin/Reptin-associated complexes impact viral pathogenesis and  
504 expression of biotic stress response pathways. **(a)** VIGS plants were infected with  
505 *Tobacco mosaic virus* or *Potato virus X* tagged with GFP (TMV-GFP or PVX-GFP,  
506 respectively) by agroinfiltration 14 days after initiating VIGS. Viral spread was observed  
507 using high-intensity UV light. Comparable results were obtained with either virus.  
508 Representative images of TMV-GFP spread are shown here 7 days after infection.  
509 TMV-GFP and PVX-GFP readily spread systemically in mock-treated (TRV::*GUS*),  
510 TRV::*INO80*, TRV::*PIE1*, and TRV::*TELO2* plants, but was restricted to the site of  
511 primary infection (lower leaf) in TRV::*Reptin*, TRV::*Pontin*, TRV::*TIP60*, and TRV::*TOR*  
512 plants. **(b)** Total protein was extracted from shoot apices of plants as in panel (a) and  
513 analyzed by SDS-PAGE followed Western blots against GFP. This validated the visual

514 observation that TMV-GFP did not spread systemically in TRV::*Reptin*, TRV::*Pontin*,  
515 and TRV::*TOR*, and only slightly entered shoot apices in TRV::*TIP60* plants. Ponceau  
516 staining is shown as a loading control. **(c)** RNA-Seq of TRV::*Reptin* and TRV::*TIP60*  
517 plants showed consistent, significant upregulation of transcripts involved in biotic stress  
518 responses, including mRNAs that encode WRKY transcription factors, pathogen  
519 receptors, and stress response hormone signal transduction pathways. Gene  
520 ontologies were assigned with MapMan, *p* values were determined with MapMan using  
521 a Mann Whitney test with stringent false positive correction, and box plots indicate the  
522 quartiles and Tukey's whiskers for all genes in each MapMan category.  
523



525 **References**

- 526 **Ahn CS, Han JA, Lee HS, Lee S, Pai HS. 2011.** The PP2A regulatory subunit Tap46, a  
527 component of the TOR signaling pathway, modulates growth and metabolism in plants.  
528 *Plant Cell* **23**: 185–209.
- 529 **Armenteros-Monterroso E, Zhao L, Gasparoli L, Brooks T, Pearce K, Mansour MR,**  
530 **Martens JHA, de Boer J, Williams O. 2019.** The AAA+ATPase RUVBL2 is essential  
531 for the oncogenic function of c-MYB in acute myeloid leukemia. *Leukemia* **33**: 2817–  
532 2829.
- 533 **Arnold CN, Pirie E, Dosenovic P, McInerney GM, Xia Y, Wang N, Li X, Siggs OM,**  
534 **Karlsson Hedestam GB, Beutler B. 2012.** A forward genetic screen reveals roles for  
535 Nfkbid, Zeb1, and Ruvbl2 in humoral immunity. *Proceedings of the National Academy of*  
536 *Sciences* **109**: 12286–12293.
- 537 **Assimon VA, Tang Y, Vargas JD, Lee GJ, Wu ZY, Lou K, Yao B, Menon M-K, Pios**  
538 **A, Perez KC, et al. 2019.** CB-6644 Is a Selective Inhibitor of the RUVBL1/2 Complex  
539 with Anticancer Activity. *ACS Chemical Biology* **14**: 236–244.
- 540 **Azim MF, Burch-Smith TM. 2020.** Organelles-nucleus-plasmodesmata signaling  
541 (ONPS): an update on its roles in plant physiology, metabolism and stress responses.  
542 *Current Opinion in Plant Biology* **58**: 48–59.
- 543 **Bombarely A, Rosli HG, Vrebalov J, Moffett P, Mueller LA, Martin GB. 2012.** A draft  
544 genome sequence of *Nicotiana benthamiana* to enhance molecular plant-microbe  
545 biology research. *Molecular Plant-Microbe Interactions* **25**: 1523–1530.
- 546 **Boulon S, Pradet-Balade B, Verheggen C, Molle D, Boireau S, Georgieva M, Azzag**  
547 **K, Robert M-C, Ahmad Y, Neel H, et al. 2010.** HSP90 and Its R2TP/Prefoldin-like  
548 Cochaperone Are Involved in the Cytoplasmic Assembly of RNA Polymerase II.  
549 *Molecular Cell* **39**: 912–924.
- 550 **Brunkard JO. 2020.** Exaptive Evolution of Target of Rapamycin Signaling in  
551 Multicellular Eukaryotes. *Developmental Cell* **54**: 142–155.
- 552 **Brunkard JO, Burch-Smith TM, Runkel AM, Zambryski P. 2015.** Investigating  
553 plasmodesmata genetics with virus-induced gene silencing and an agrobacterium-  
554 mediated GFP movement assay. In: *Methods in Molecular Biology*. Department of Plant  
555 and Microbial Biology, University of California, 281A Koshland Hall, Berkeley, CA,

556 94720, USA. DOI - 10.1007/978-1-4939-1523-1\_13 SRC - Pubmed ID2 - 25287205 FG  
557 - 0, 185–198.

558 **Brunkard JO, Xu M, Regina Scarpin M, Chatterjee S, Shemyakina EA, Goodman**  
559 **HM, Zambryski P. 2020.** TOR dynamically regulates plant cell-cell transport.  
560 *Proceedings of the National Academy of Sciences of the United States of America* **117**:  
561 5049–5058.

562 **Brunkard JO, Zambryski PC. 2017.** Plasmodesmata enable multicellularity: new  
563 insights into their evolution, biogenesis, and functions in development and immunity.  
564 *Current Opinion in Plant Biology* **35**: 76–83.

565 **Burch-Smith TM, Cui Y, Zambryski PC. 2012.** Reduced levels of class 1 reversibly  
566 glycosylated polypeptide increase intercellular transport via plasmodesmata. *Plant*  
567 *Signaling & Behavior* **7**: 62–67.

568 **Burch-Smith TM, Schiff M, Liu Y, Dinesh-Kumar SP. 2006.** Efficient virus-induced  
569 gene silencing in Arabidopsis. *Plant Physiology* **142**: 21–27.

570 **Burch-Smith TM, Zambryski PC. 2010.** Loss of increased size exclusion limit (ise)1 or  
571 ise2 increases the formation of secondary plasmodesmata. *Current Biology* **20**: 989–  
572 993.

573 **Busche M, Scarpin MR, Hnasko R, Brunkard JO. 2021.** TOR coordinates nucleotide  
574 availability with ribosome biogenesis in plants. *The Plant Cell* **33**: 1615–1632.

575 **Chuluunbaatar U, Roller R, Feldman ME, Brown S, Shokat KM, Mohr I. 2010.**  
576 Constitutive mTORC1 activation by a herpesvirus Akt surrogate stimulates mRNA  
577 translation and viral replication. *Genes and Development* **24**: 2627–2639.

578 **Coulombe B, Cloutier P, Pinard M, Forget D, Poitras C, Gauthier M-S. 2020.** The  
579 PAQosome, a novel molecular chaperoning machine for assembly of human protein  
580 complexes and networks. *The FASEB Journal* **34**: 1–1.

581 **D K, B L, SL S. 2015.** HISAT: a fast spliced aligner with low memory requirements.  
582 *Nature methods* **12**: 357–360.

583 **Dauden MI, López-Perrote A, Llorca O. 2021.** RUVBL1–RUVBL2 AAA-ATPase: a  
584 versatile scaffold for multiple complexes and functions. *Current Opinion in Structural*  
585 *Biology* **67**: 78–85.

586 **Flavin P, Redmond A, McBryan J, Cocchiglia S, Tibbitts P, Fahy-Browne P, Kay E,**



587 **Treumann A, Perrem K, McIlroy M, et al. 2011.** RuvBI2 cooperates with Ets2 to  
588 transcriptionally regulate hTERT in colon cancer. *FEBS Letters* **585**: 2537–2544.

589 **Fritsch O, Benvenuto G, Bowler C, Molinier J, Hohn B. 2004.** The INO80 Protein  
590 Controls Homologous Recombination in *Arabidopsis thaliana*. *Molecular Cell* **16**: 479–  
591 485.

592 **Garcia N, Li Y, Dooner HK, Messing J. 2017.** Maize defective kernel mutant  
593 generated by insertion of a Ds element in a gene encoding a highly conserved TTI2  
594 cochaperone. *Proceedings of the National Academy of Sciences of the United States of*  
595 *America* **114**: 5165–5170.

596 **Grant M, Godiard L, Straube E, Ashfield T, Lewald J, Sattler A, Innes R, Dangl J.**  
597 **1995.** Structure of the *Arabidopsis* RPM1 gene enabling dual specificity disease  
598 resistance. *Science* **269**: 843–846.

599 **Guertin DA, Stevens DM, Thoreen CC, Burds AA, Kalaany NY, Moffat J, Brown M,**  
600 **Fitzgerald KJ, Sabatini DM. 2006.** Ablation in Mice of the mTORC Components raptor,  
601 rictor, or mLST8 Reveals that mTORC2 Is Required for Signaling to Akt-FOXO and  
602 PKC $\alpha$ , but Not S6K1. *Developmental Cell* **11**: 859–871.

603 **Holt BF, Boyes DC, Ellerström M, Siefers N, Wiig A, Kauffman S, Grant MR, Dangl**  
604 **JL. 2002.** An evolutionarily conserved mediator of plant disease resistance gene  
605 function is required for normal *Arabidopsis* development. *Developmental Cell* **2**: 807–  
606 817.

607 **Hořejší Z, Takai H, Adelman CA, Collis SJ, Flynn H, Maslen S, Skehel JM, de**  
608 **Lange T, Boulton SJ. 2010.** CK2 phospho-dependent binding of R2TP complex to  
609 TEL2 is essential for mTOR and SMG1 stability. *Molecular Cell* **39**: 839–850.

610 **Horner W, Brunkard JO. 2021.** Cytokinins Stimulate Plasmodesmatal Transport in  
611 Leaves. *Frontiers in Plant Science* **12**: 674128.

612 **Hosokawa H, Tanaka T, Kato M, Shinoda K, Tohyama H, Hanazawa A, Tamaki Y,**  
613 **Hirahara K, Yagi R, Sakikawa I, et al. 2013.** Gata3/Ruvbl2 complex regulates T helper  
614 2 cell proliferation via repression of Cdkn2c expression. *Proceedings of the National*  
615 *Academy of Sciences* **110**: 18626–18631.

616 **Houry WA, Bertrand E, Coulombe B. 2018.** The PAQosome, an R2TP-Based  
617 Chaperone for Quaternary Structure Formation. *Trends in Biochemical Sciences* **43**: 4–

- 618 9.
- 619 **Huber O, Ménard L, Haurie V, Nicou A, Taras D, Rosenbaum J. 2008.** Pontin and  
620 Reptin, Two Related ATPases with Multiple Roles in Cancer: Figure 1. *Cancer*  
621 *Research* **68**: 6873–6876.
- 622 **Huen J, Kakihara Y, Uguw F, Cheung KLY, Ortega J, Houry WA. 2010.** Rvb1–Rvb2:  
623 essential ATP-dependent helicases for critical complexes This paper is one of a  
624 selection of papers published in this special issue entitled 8th International Conference  
625 on AAA Proteins and has undergone the Journal's usual peer review process.  
626 *Biochemistry and Cell Biology* **88**: 29–40.
- 627 **Hwang Y, Kim LC, Song W, Edwards DN, Cook RS, Chen J. 2019.** Disruption of the  
628 Scaffolding Function of mLST8 Selectively Inhibits mTORC2 Assembly and Function  
629 and Suppresses mTORC2-Dependent Tumor Growth In Vivo. *Cancer Research* **79**:  
630 3178–3184.
- 631 **Ikura T, Ogryzko V V., Grigoriev M, Groisman R, Wang J, Horikoshi M, Scully R,**  
632 **Qin J, Nakatani Y. 2000.** Involvement of the TIP60 histone acetylase complex in DNA  
633 repair and apoptosis. *Cell* **102**: 463–473.
- 634 **Jha S, Gupta A, Dar A, Dutta A. 2013.** RVBs Are Required for Assembling a  
635 Functional TIP60 Complex. *Molecular and Cellular Biology* **33**: 1164–1174.
- 636 **Jha S, Shibata E, Dutta A. 2008.** Human Rvb1/Tip49 Is Required for the Histone  
637 Acetyltransferase Activity of Tip60/NuA4 and for the Downregulation of Phosphorylation  
638 on H2AX after DNA Damage. *Molecular and Cellular Biology* **28**: 2690–2700.
- 639 **Kakihara Y, Houry WA. 2012.** The R2TP complex: Discovery and functions.  
640 *Biochimica et Biophysica Acta - Molecular Cell Research* **1823**: 101–107.
- 641 **Kakihara Y, Makhnevych T, Zhao L, Tang W, Houry WA. 2014.** Nutritional status  
642 modulates box C/D snoRNP biogenesis by regulated subcellular relocalization of the  
643 R2TP complex. *Genome Biology* **15**: 404.
- 644 **Karam BS, Morris RS, Bramante CT, Puskarich M, Zolfaghari EJ, Lotfi-Emran S,**  
645 **Ingraham NE, Charles A, Odde DJ, Tignanelli CJ. 2021.** mTOR inhibition in COVID-  
646 19: A commentary and review of efficacy in RNA viruses. *Journal of Medical Virology*  
647 **93**: 1843–1846.
- 648 **Kim SG, Hoffman GR, Poulogiannis G, Buel GR, Jang YJ, Lee KW, Kim BY,**

- 649 **Erikson RL, Cantley LC, Choo AY, et al. 2013.** Metabolic Stress Controls mTORC1  
650 Lysosomal Localization and Dimerization by Regulating the TTT-RUVBL1/2 Complex.  
651 *Molecular Cell* **49**: 172–185.
- 652 **Kobor MS, Venkatasubrahmanyam S, Meneghini MD, Gin JW, Jennings JL, Link  
653 AJ, Madhani HD, Rine J. 2004.** A protein complex containing the conserved  
654 Swi2/Snf2-related ATPase Swr1p deposits histone variant H2A.Z into euchromatin  
655 (Peter Becker, Ed.). *PLoS Biology* **2**: e131.
- 656 **Latrasse D, Benhamed M, Henry Y, Domenichini S, Kim W, Zhou DX, Delarue M.  
657 2008.** The MYST histone acetyltransferases are essential for gametophyte development  
658 in arabidopsis. *BMC Plant Biology* **8**: 121.
- 659 **Van Leene J, Han C, Gadeyne A, Eeckhout D, Matthijs C, Cannoot B, De Winne N,  
660 Persiau G, Van De Slijke E, Van de Cotte B, et al. 2019.** Capturing the  
661 phosphorylation and protein interaction landscape of the plant TOR kinase. *Nature  
662 Plants* **5**: 316–327.
- 663 **Lin D, Lin B, Bhanot H, Riou R, Abt NB, Rajagopal J, Saladi SV. 2020.** RUVBL1 is  
664 an amplified epigenetic factor promoting proliferation and inhibiting differentiation  
665 program in head and neck squamous cancers. *Oral Oncology* **111**: 104930.
- 666 **Liu GY, Sabatini DM. 2020.** mTOR at the nexus of nutrition, growth, ageing and  
667 disease. *Nature Reviews Molecular Cell Biology* **21**: 183–203.
- 668 **Liu Y, Schiff M, Marathe R, Dinesh-Kumar SP. 2002.** Tobacco Rar1, EDS1 and  
669 NPR1/NIM1 like genes are required for N-mediated resistance to tobacco mosaic virus.  
670 *Plant Journal* **30**: 415–429.
- 671 **March-Díaz R, García-Domínguez M, Lozano-Juste J, León J, Florencio FJ, Reyes  
672 JC. 2008.** Histone H2A.Z and homologues of components of the SWR1 complex are  
673 required to control immunity in Arabidopsis. *Plant Journal* **53**: 475–487.
- 674 **Martino F, Pal M, Muñoz-Hernández H, Rodríguez CF, Núñez-Ramírez R, Gil-  
675 Carton D, Degliesposti G, Skehel JM, Roe SM, Prodromou C, et al. 2018.** RPAP3  
676 provides a flexible scaffold for coupling HSP90 to the human R2TP co-chaperone  
677 complex. *Nature Communications* **9**.
- 678 **Maurizy C, Quinternet M, Abel Y, Verheggen C, Santo PE, Bourguet M, C.F. Paiva  
679 A, Bragantini B, Chagot M-E, Robert M-C, et al. 2018.** The RPAP3-Cterminal domain

680 identifies R2TP-like quaternary chaperones. *Nature Communications* **9**: 2093.

681 **MI L, W H, S A. 2014.** Moderated estimation of fold change and dispersion for RNA-seq  
682 data with DESeq2. *Genome biology* **15**.

683 **Mikesch J-H, Schwammbach D, Hartmann W, Schmidt LH, Schliemann C,**  
684 **Angenendt L, Wiewrodt R, Marra A, Thoennissen NH, Wardelmann E, et al. 2018.**  
685 Reptin drives tumour progression and resistance to chemotherapy in nonsmall cell lung  
686 cancer. *European Respiratory Journal* **52**: 1701637.

687 **Moorman NJ, Shenk T. 2010.** Rapamycin-Resistant mTORC1 Kinase Activity Is  
688 Required for Herpesvirus Replication. *Journal of Virology* **84**: 5260–5269.

689 **Moreau M, Azzopardi M, Clément G, Dobrenel T, Marchive C, Renne C, Martin-**  
690 **Magniette ML, Taconnat L, Renou JP, Robaglia C, et al. 2012.** Mutations in the  
691 Arabidopsis homolog of LST8/GβL, a partner of the target of Rapamycin kinase, impair  
692 plant growth, flowering, and metabolic adaptation to long days. *Plant Cell* **24**: 463–481.

693 **Mullen PJ, Garcia G, Purkayastha A, Matulionis N, Schmid EW, Momcilovic M, Sen**  
694 **C, Langerman J, Ramaiah A, Shackelford DB, et al. 2021.** SARS-CoV-2 infection  
695 rewires host cell metabolism and is potentially susceptible to mTORC1 inhibition. *Nature*  
696 *Communications* **12**: 1876.

697 **Müller-Moulé P, Conklin PL, Niyogi KK. 2002.** Ascorbate deficiency can limit  
698 violaxanthin de-epoxidase activity in vivo. *Plant Physiology* **128**: 970–977.

699 **Muñoz-Hernández H, Pal M, Rodríguez CF, Fernandez-Leiro R, Prodromou C,**  
700 **Pearl LH, Llorca O. 2019.** Structural mechanism for regulation of the AAA-ATPases  
701 RUVBL1-RUVBL2 in the R2TP co-chaperone revealed by cryo-EM. *Science Advances*  
702 **5**: eaaw1616.

703 **Noh YS, Amasino RM. 2003.** PIE1, an ISWI family gene, is required for FLC activation  
704 and floral repression in Arabidopsis. *Plant Cell* **15**: 1671–1682.

705 **O T, O B, Y G, A N, S M, P K, J S, LA M, SY R, M S. 2004.** MAPMAN: a user-driven  
706 tool to display genomics data sets onto diagrams of metabolic pathways and other  
707 biological processes. *The Plant journal* □: *for cell and molecular biology* **37**: 914–939.

708 **Osaki H, Walf-Vorderwülbecke V, Mangolini M, Zhao L, Horton SJ, Morrone G,**  
709 **Schuringa JJ, de Boer J, Williams O. 2013.** The AAA+ ATPase RUVBL2 is a critical  
710 mediator of MLL-AF9 oncogenesis. *Leukemia* **27**: 1461–1468.

- 711 **Ouibrahim L, Rubio AG, Moretti A, Montané MH, Menand B, Meyer C, Robaglia C,**  
712 **Caranta C. 2015.** Potyviruses differ in their requirement for TOR signalling. *Journal of*  
713 *General Virology* **96**: 2898–2903.
- 714 **Pal M, Muñoz-Hernandez H, Bjorklund D, Zhou L, Degliesposti G, Skehel JM,**  
715 **Hesketh EL, Thompson RF, Pearl LH, Llorca O, et al. 2021.** Structure of the TELO2-  
716 TTI1-TTI2 complex and its function in TOR recruitment to the R2TP chaperone. *Cell*  
717 *Reports* **36**: 109317.
- 718 **Parker JE, Coleman MJ, Szabò V, Frost LN, Schmidt R, van der Biezen EA,**  
719 **Moore T, Dean C, Daniels MJ, Jones JD. 1997.** The Arabidopsis downy mildew  
720 resistance gene RPP5 shares similarity to the toll and interleukin-1 receptors with N and  
721 L6. *The Plant Cell* **9**: 879–894.
- 722 **Peart JR, Cook G, Feys BJ, Parker JE, Baulcombe DC. 2002.** An EDS1 orthologue is  
723 required for N-mediated resistance against tobacco mosaic virus. *The Plant Journal* **29**:  
724 569–579.
- 725 **Rivera-Calzada A, Pal M, Muñoz-Hernández H, Luque-Ortega JR, Gil-Carton D,**  
726 **Degliesposti G, Skehel JM, Prodromou C, Pearl LH, Llorca O. 2017.** The Structure  
727 of the R2TP Complex Defines a Platform for Recruiting Diverse Client Proteins to the  
728 HSP90 Molecular Chaperone System. *Structure* **25**: 1145-1152.e4.
- 729 **Rosenbaum J, Baek SH, Dutta A, Houry WA, Huber O, Hupp TR, Matias PM. 2013.**  
730 The emergence of the conserved AAA+ ATPases pontin and reptin on the signaling  
731 landscape. *Science Signaling* **6**: mr1.
- 732 **S A, PT P, W H. 2015.** HTSeq--a Python framework to work with high-throughput  
733 sequencing data. *Bioinformatics (Oxford, England)* **31**: 166–169.
- 734 **Scarpin MR, Leiboff S, Brunkard JO. 2020.** Parallel global profiling of plant tor  
735 dynamics reveals a conserved role for larp1 in translation. *eLife* **9**: 1–34.
- 736 **Schořová Š, Fajkus J, Záveská Drábková L, Honys D, Schrumfová PP. 2019.** The  
737 plant Pontin and Reptin homologues, RuvBL1 and RuvBL2a, colocalize with TERT and  
738 TRB proteins in vivo, and participate in telomerase biogenesis. *Plant Journal* **98**: 195–  
739 212.
- 740 **Shin SH, Lee JS, Zhang J-M, Choi S, Boskovic Z V., Zhao R, Song M, Wang R,**  
741 **Tian J, Lee M-H, et al. 2020.** Synthetic lethality by targeting the RUVBL1/2-TTT

742 complex in mTORC1-hyperactive cancer cells. *Science Advances* **6**: eaay9131.

743 **Stonebloom S, Burch-Smith T, Kim I, Meinke D, Mindrinos M, Zambryski P. 2009.**

744 Loss of the plant DEAD-box protein ISE1 leads to defective mitochondria and increased

745 cell-to-cell transport via plasmodesmata. *Proceedings of the National Academy of*

746 *Sciences of the United States of America* **106**: 17229–17234.

747 **Takai H, Wang RC, Takai KK, Yang H, de Lange T. 2007.** Tel2 Regulates the Stability

748 of PI3K-Related Protein Kinases. *Cell* **131**: 1248–1259.

749 **Takai H, Xie Y, De Lange T, Pavletich NP. 2010.** Tel2 structure and function in the

750 Hsp90-dependent maturation of mTOR and ATR complexes. *Genes and Development*

751 **24**: 2019–2030.

752 **Teresa Ruiz M, Voinnet O, Baulcombe DC. 1998.** Initiation and maintenance of virus-

753 induced gene silencing. *Plant Cell* **10**: 937–946.

754 **Thimm O, Bläsing O, Gibon Y, Nagel A, Meyer S, Krüger P, Selbig J, Müller LA,**

755 **Rhee SY, Stitt M. 2004.** MAPMAN: A user-driven tool to display genomics data sets

756 onto diagrams of metabolic pathways and other biological processes. *Plant Journal* **37**:

757 914–939.

758 **Valvezan AJ, Manning BD. 2019.** Molecular logic of mTORC1 signalling as a

759 metabolic rheostat. *Nature Metabolism* **1**: 321–333.

760 **Venteicher AS, Meng Z, Mason PJ, Veenstra TD, Artandi SE. 2008.** Identification of

761 ATPases Pontin and Reptin as Telomerase Components Essential for Holoenzyme

762 Assembly. *Cell* **132**: 945–957.

763 **De Vleeschauwer D, Filipe O, Hoffman G, Seifi HS, Haeck A, Canlas P, Van**

764 **Bockhaven J, De Waele E, Demeestere K, Ronald P, et al. 2018.** Target of

765 rapamycin signaling orchestrates growth–defense trade-offs in plants. *New Phytologist*

766 **217**: 305–319.

767 **Whitham S, Dinesh-Kumar SP, Choi D, Hehl R, Corr C, Baker B. 1994.** The product

768 of the tobacco mosaic virus resistance gene N: Similarity to toll and the interleukin-1

769 receptor. *Cell* **78**: 1101–1115.

770 **Yan T, Liu F, Gao J, Lu H, Cai J, Zhao X, Sun Y. 2019.** Multilevel regulation of

771 RUVBL2 expression predicts poor prognosis in hepatocellular carcinoma. *Cancer Cell*

772 *International* **19**: 249.

773 **Yenerall P, Das AK, Wang S, Kollipara RK, Li LS, Villalobos P, Flaming J, Lin Y-F,**  
774 **Huffman K, Timmons BC, et al. 2020.** RUVBL1/RUVBL2 ATPase Activity Drives  
775 PAQosome Maturation, DNA Replication and Radioresistance in Lung Cancer. *Cell*  
776 *Chemical Biology* **27**: 105-121.e14.

777 **Zhang C, Cao L, Rong L, An Z, Zhou W, Ma J, Shen WH, Zhu Y, Dong A. 2015.** The  
778 chromatin-remodeling factor AtINO80 plays crucial roles in genome stability  
779 maintenance and in plant development. *Plant Journal* **82**: 655–668.

780 **Zhang R, Cheung CY, Seo S-U, Liu H, Pardeshi L, Wong KH, Chow LMC, Chau MP,**  
781 **Wang Y, Lee AR, et al. 2021.** RUVBL1/2 Complex Regulates Pro-Inflammatory  
782 Responses in Macrophages via Regulating Histone H3K4 Trimethylation. *Frontiers in*  
783 *Immunology* **12**.

784 **Zhao R, Kakihara Y, Gribun A, Huen J, Yang G, Khanna M, Costanzo M, Brost RL,**  
785 **Boone C, Hughes TR, et al. 2008.** Molecular chaperone Hsp90 stabilizes Pih1/Nop17  
786 to maintain R2TP complex activity that regulates snoRNA accumulation. *Journal of Cell*  
787 *Biology* **180**: 563–578.

788 **Zhou Y, Hou Y, Shen J, Huang Y, Martin W, Cheng F. 2020.** Network-based drug  
789 repurposing for novel coronavirus 2019-nCoV/SARS-CoV-2. *Cell Discovery* **6**.

790

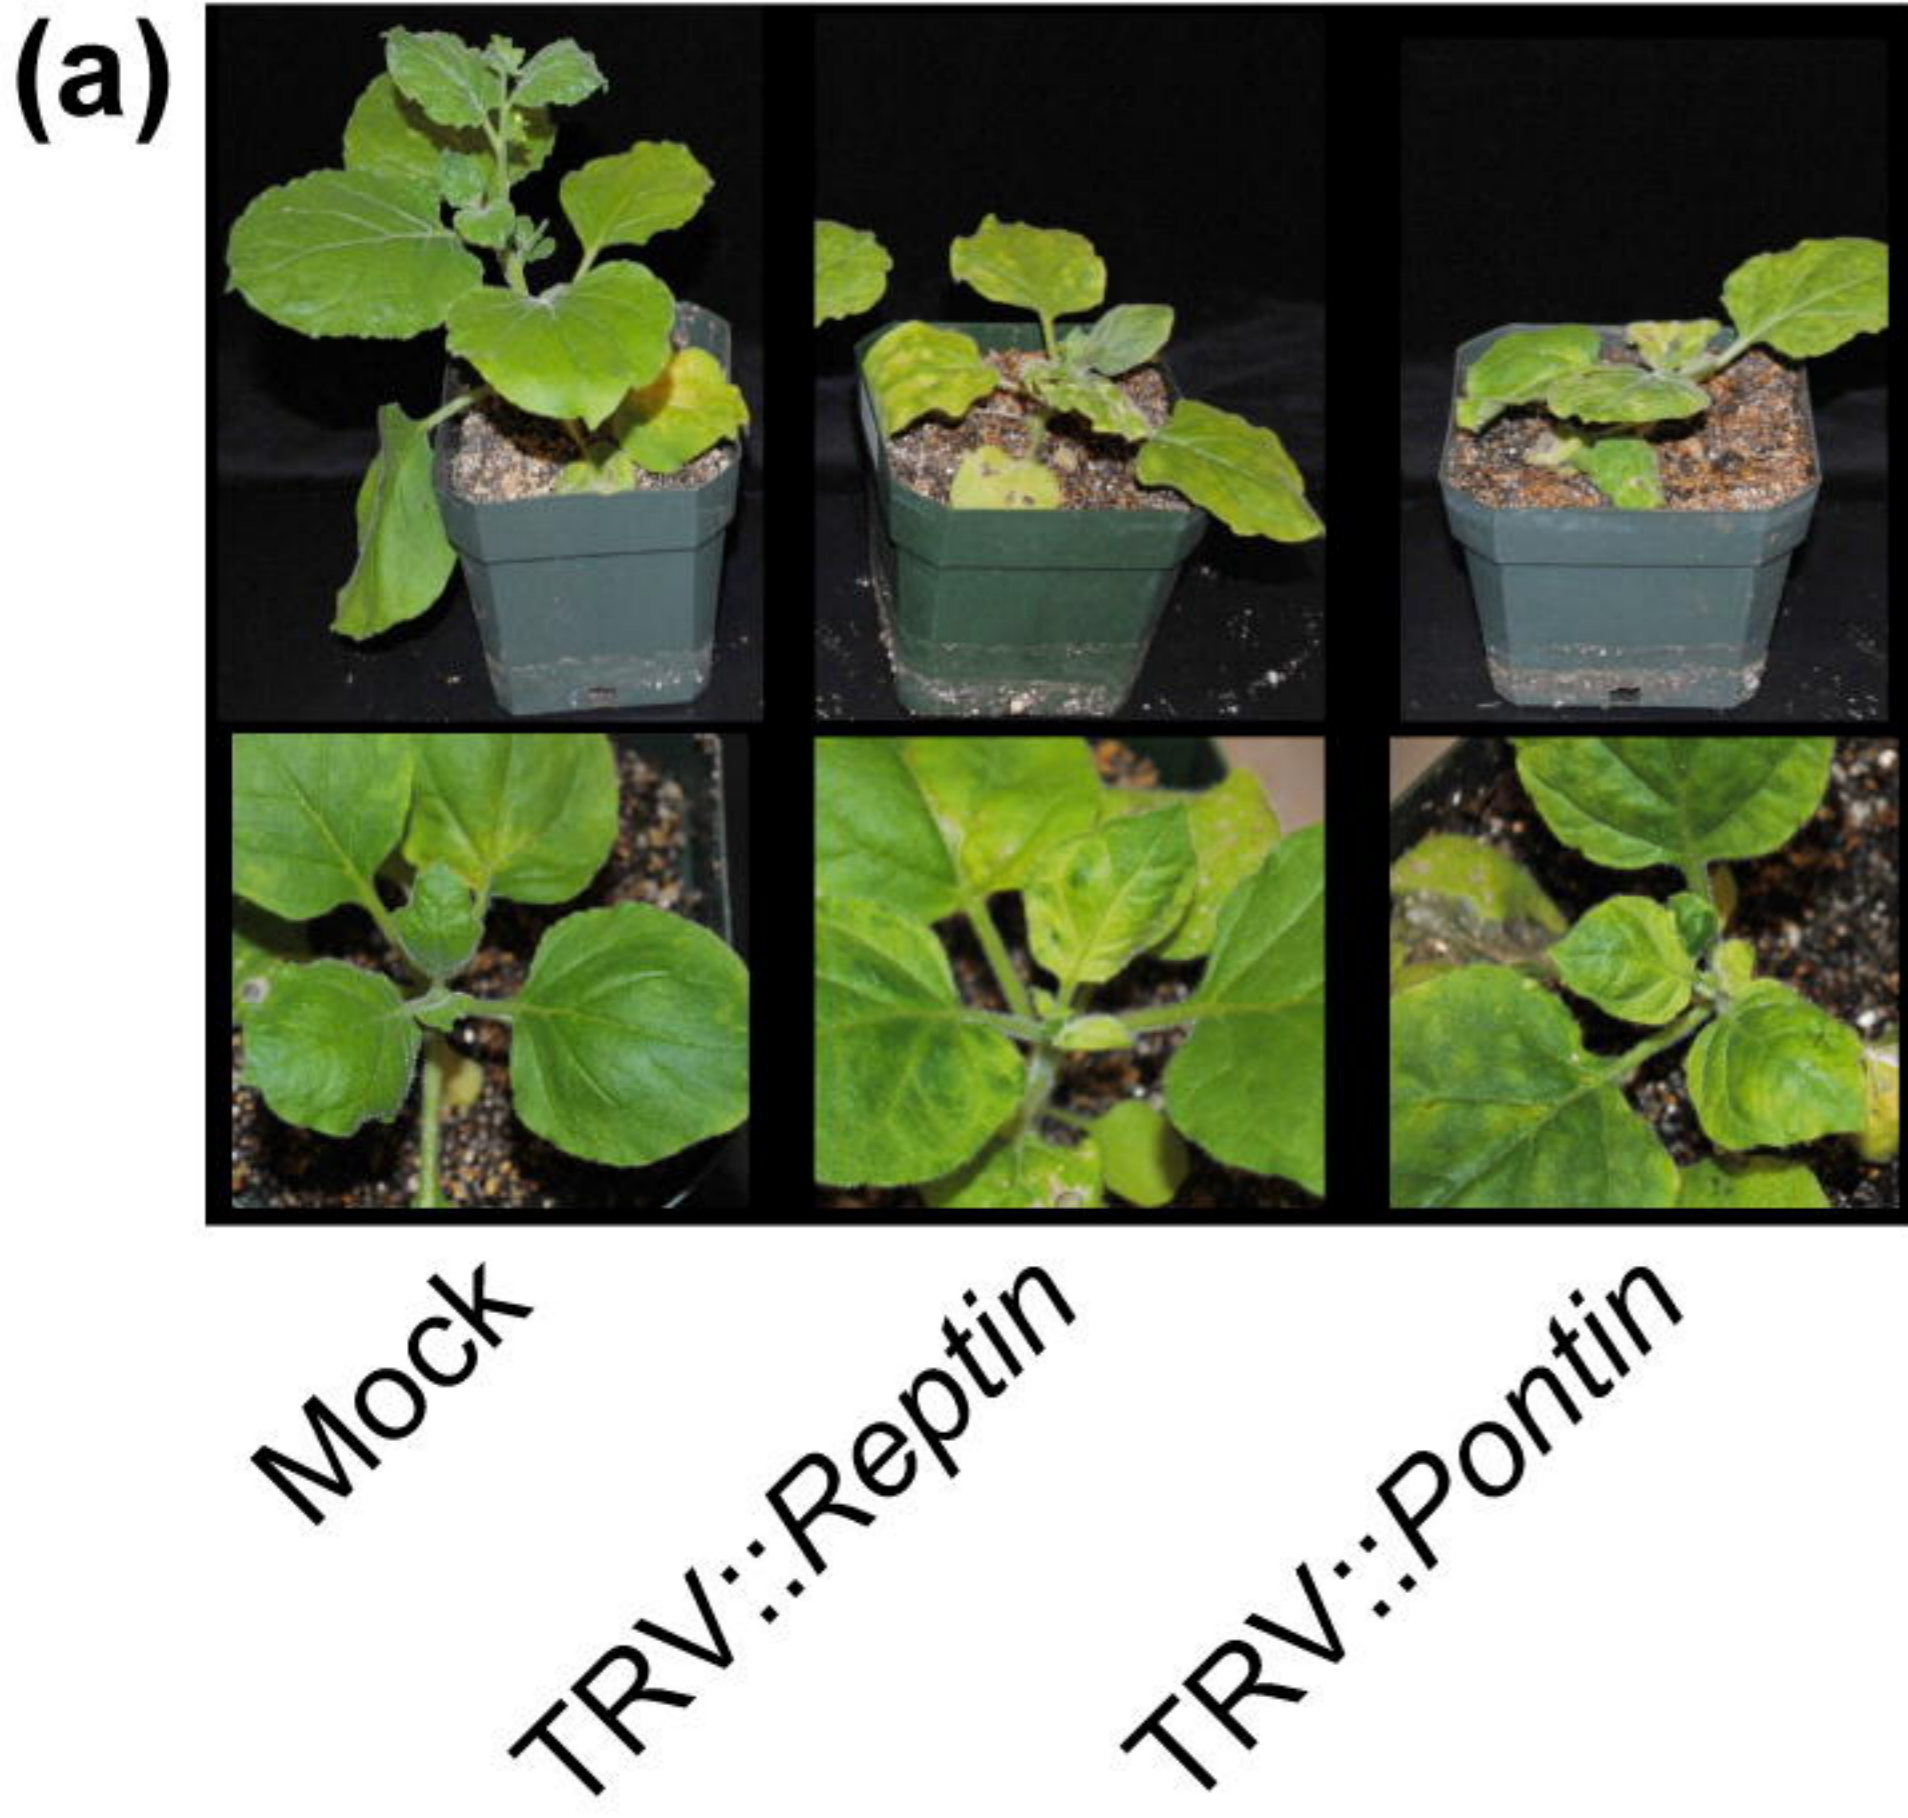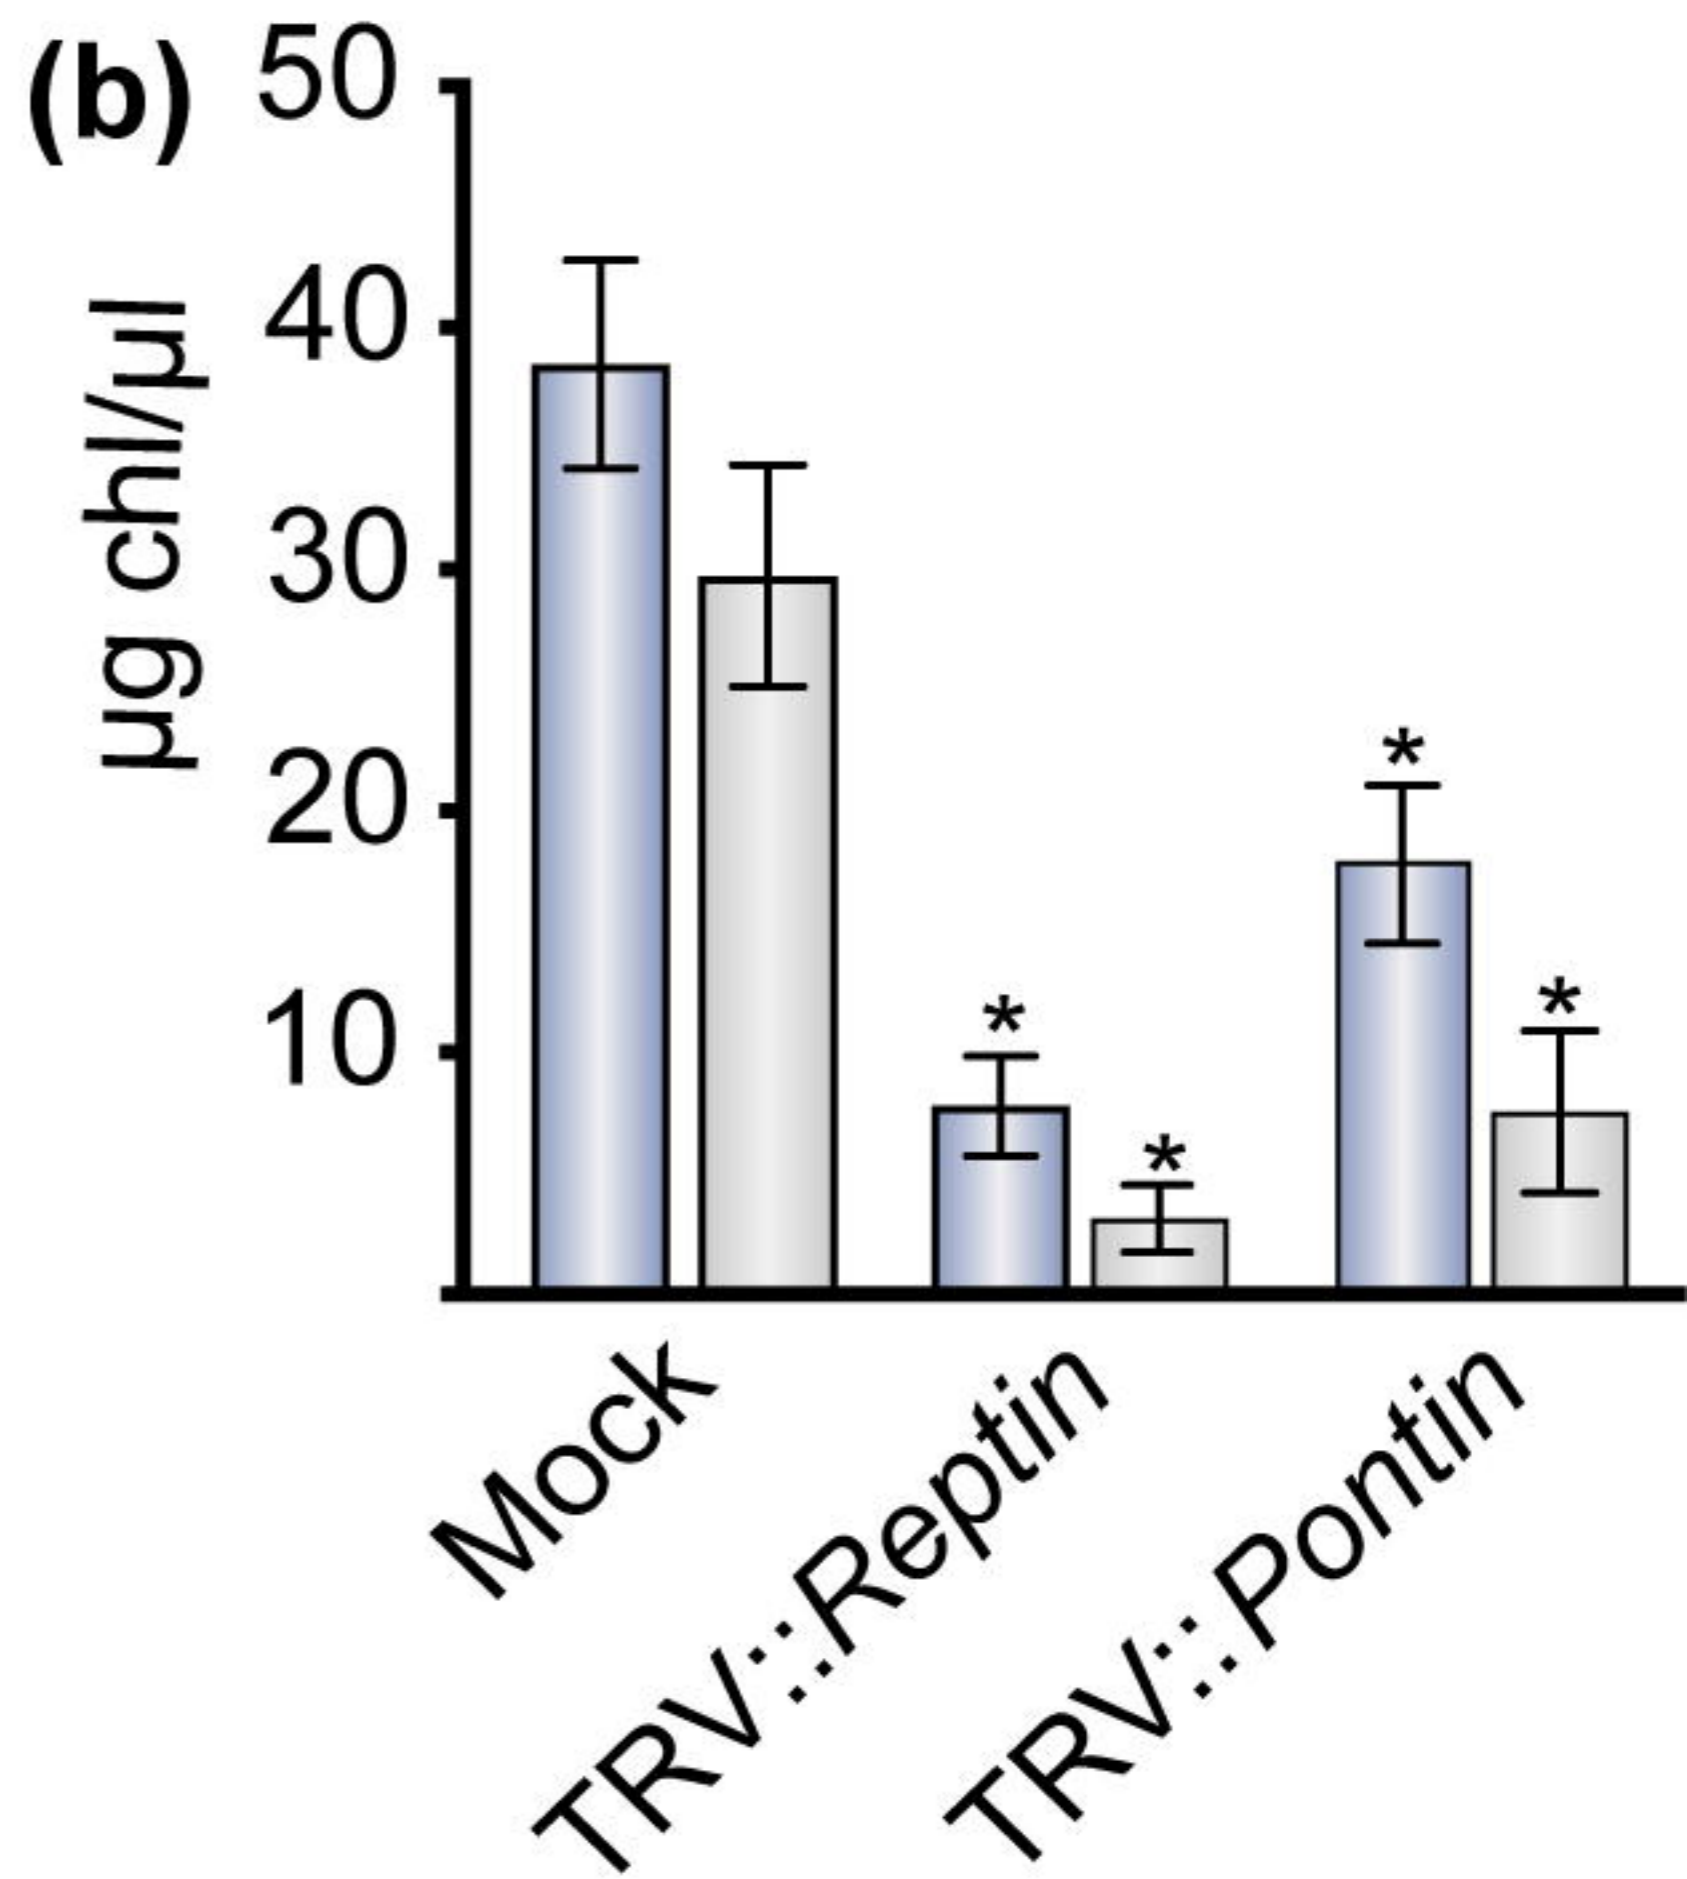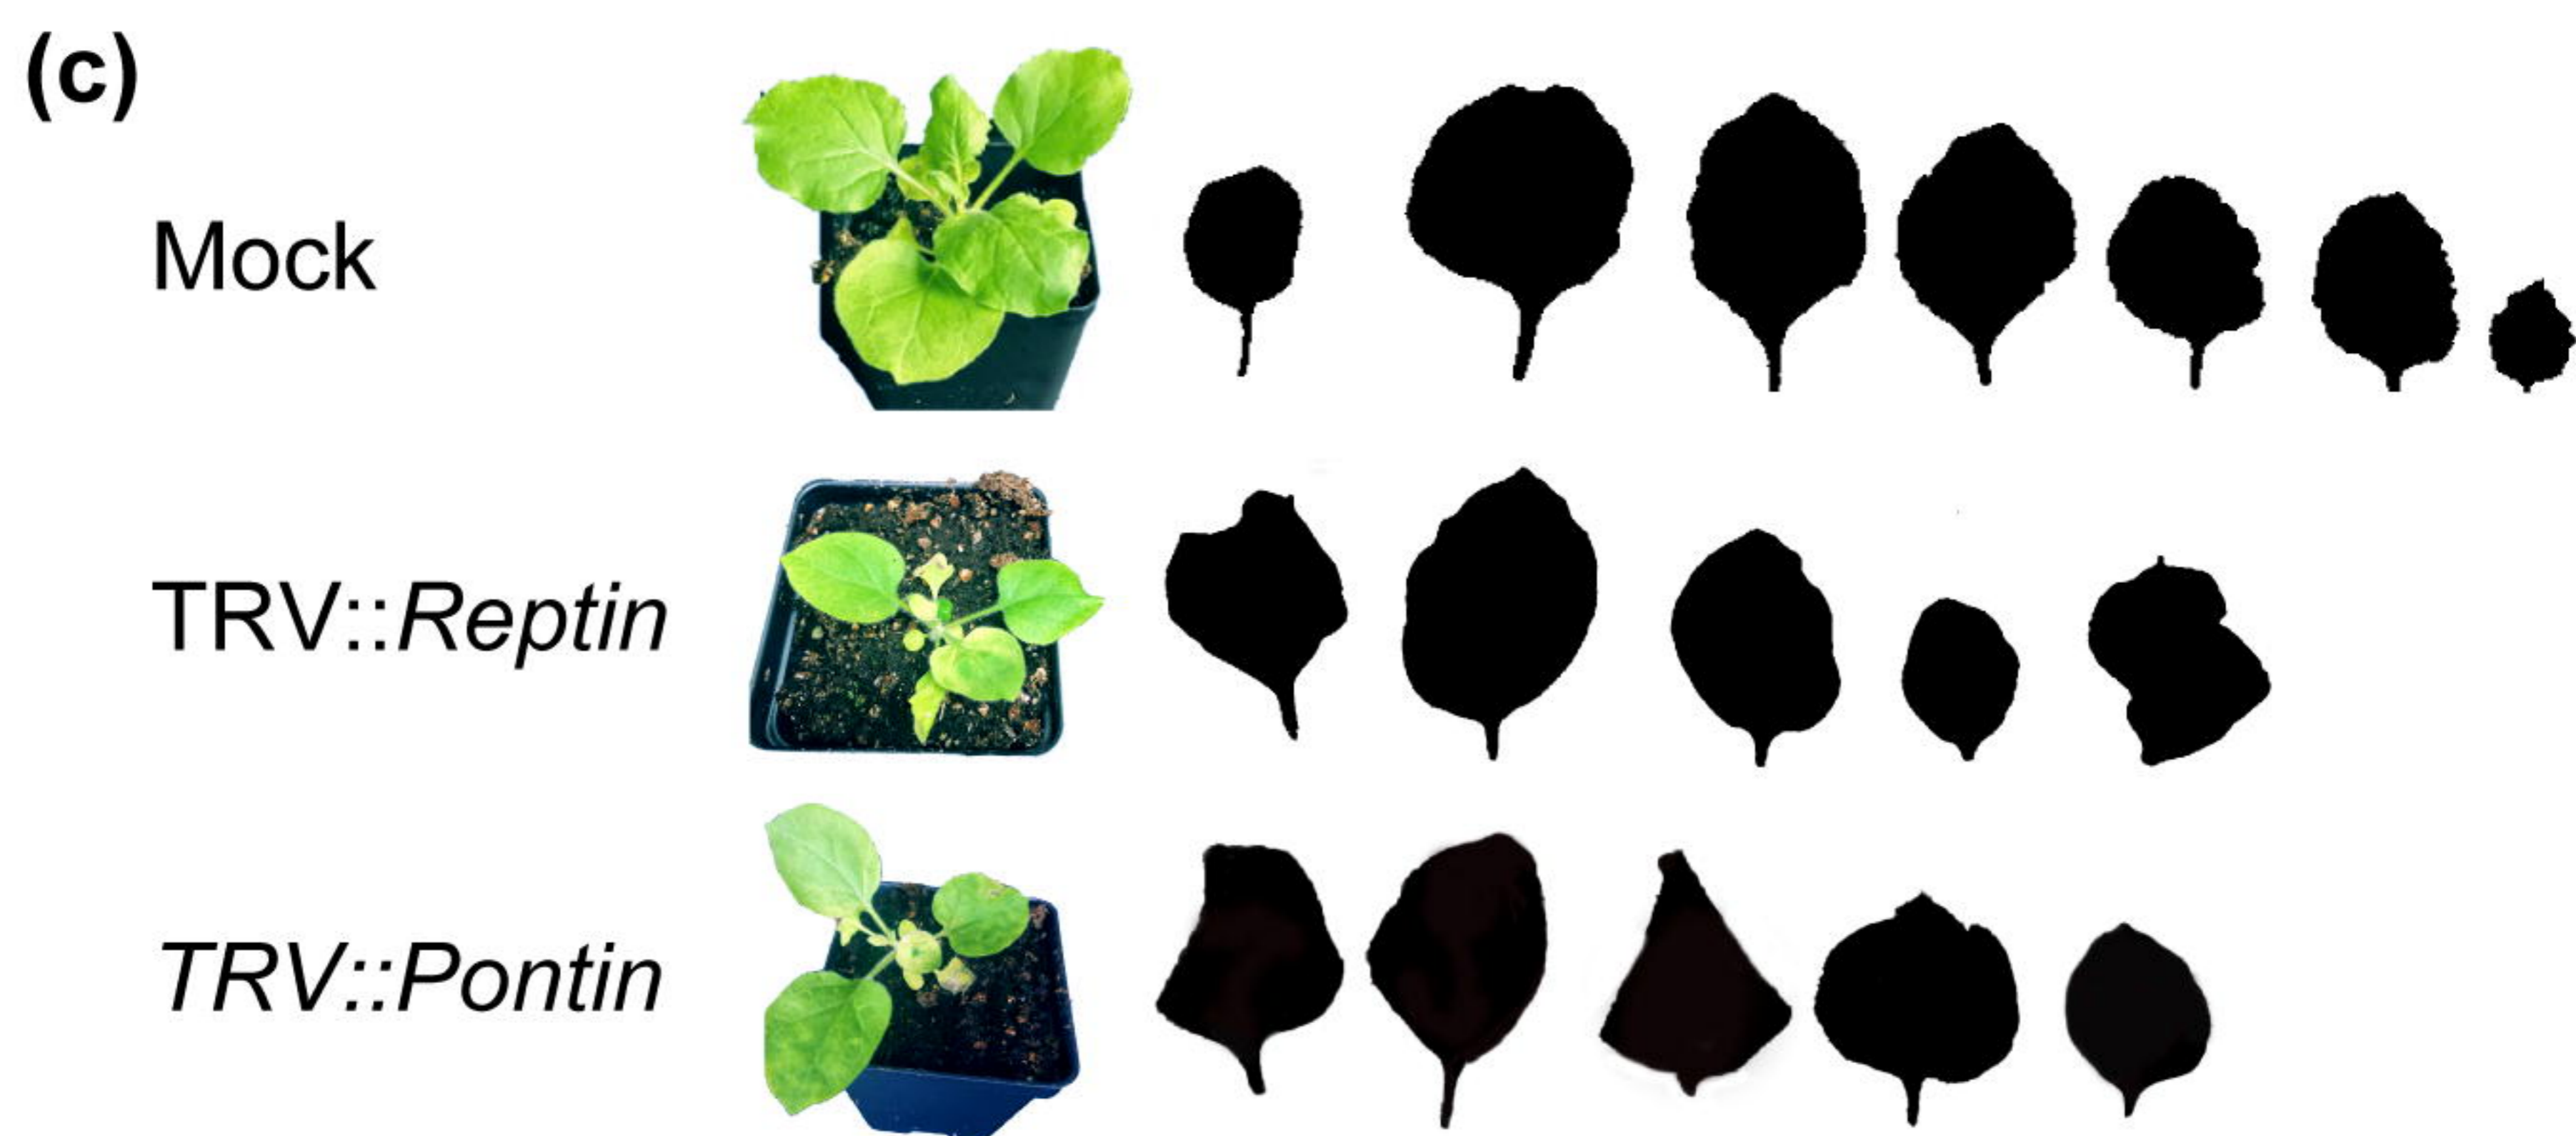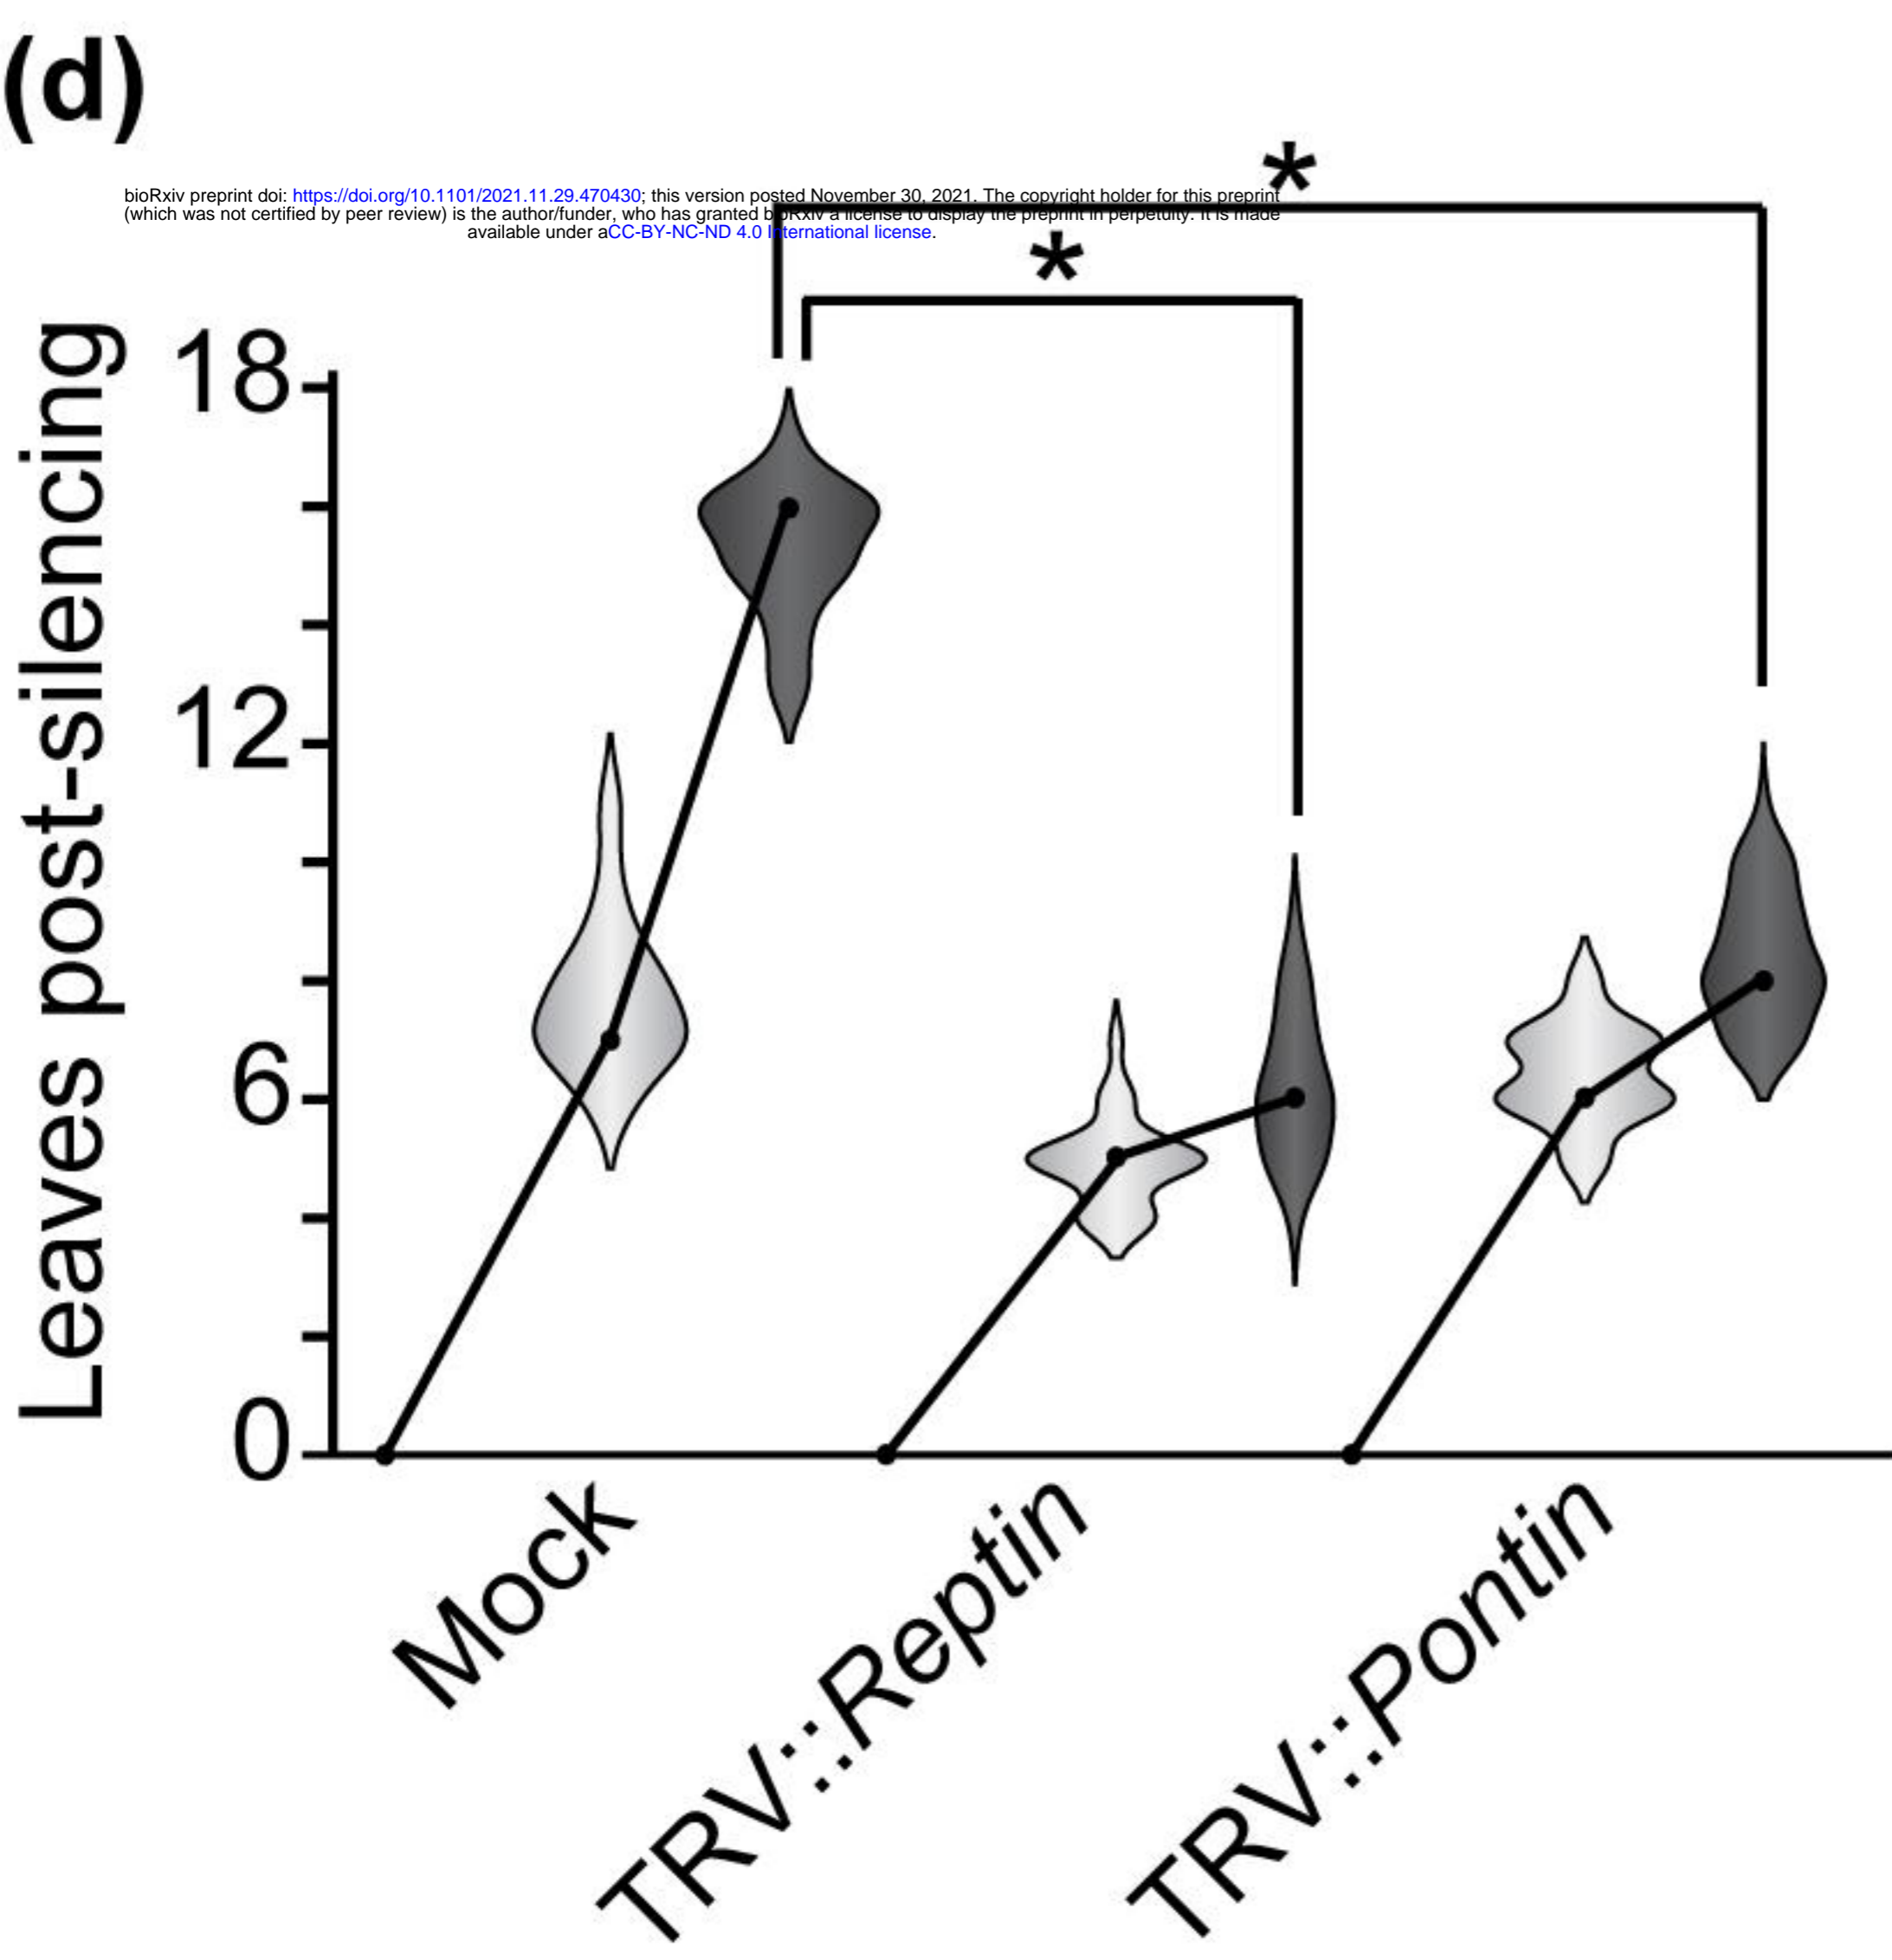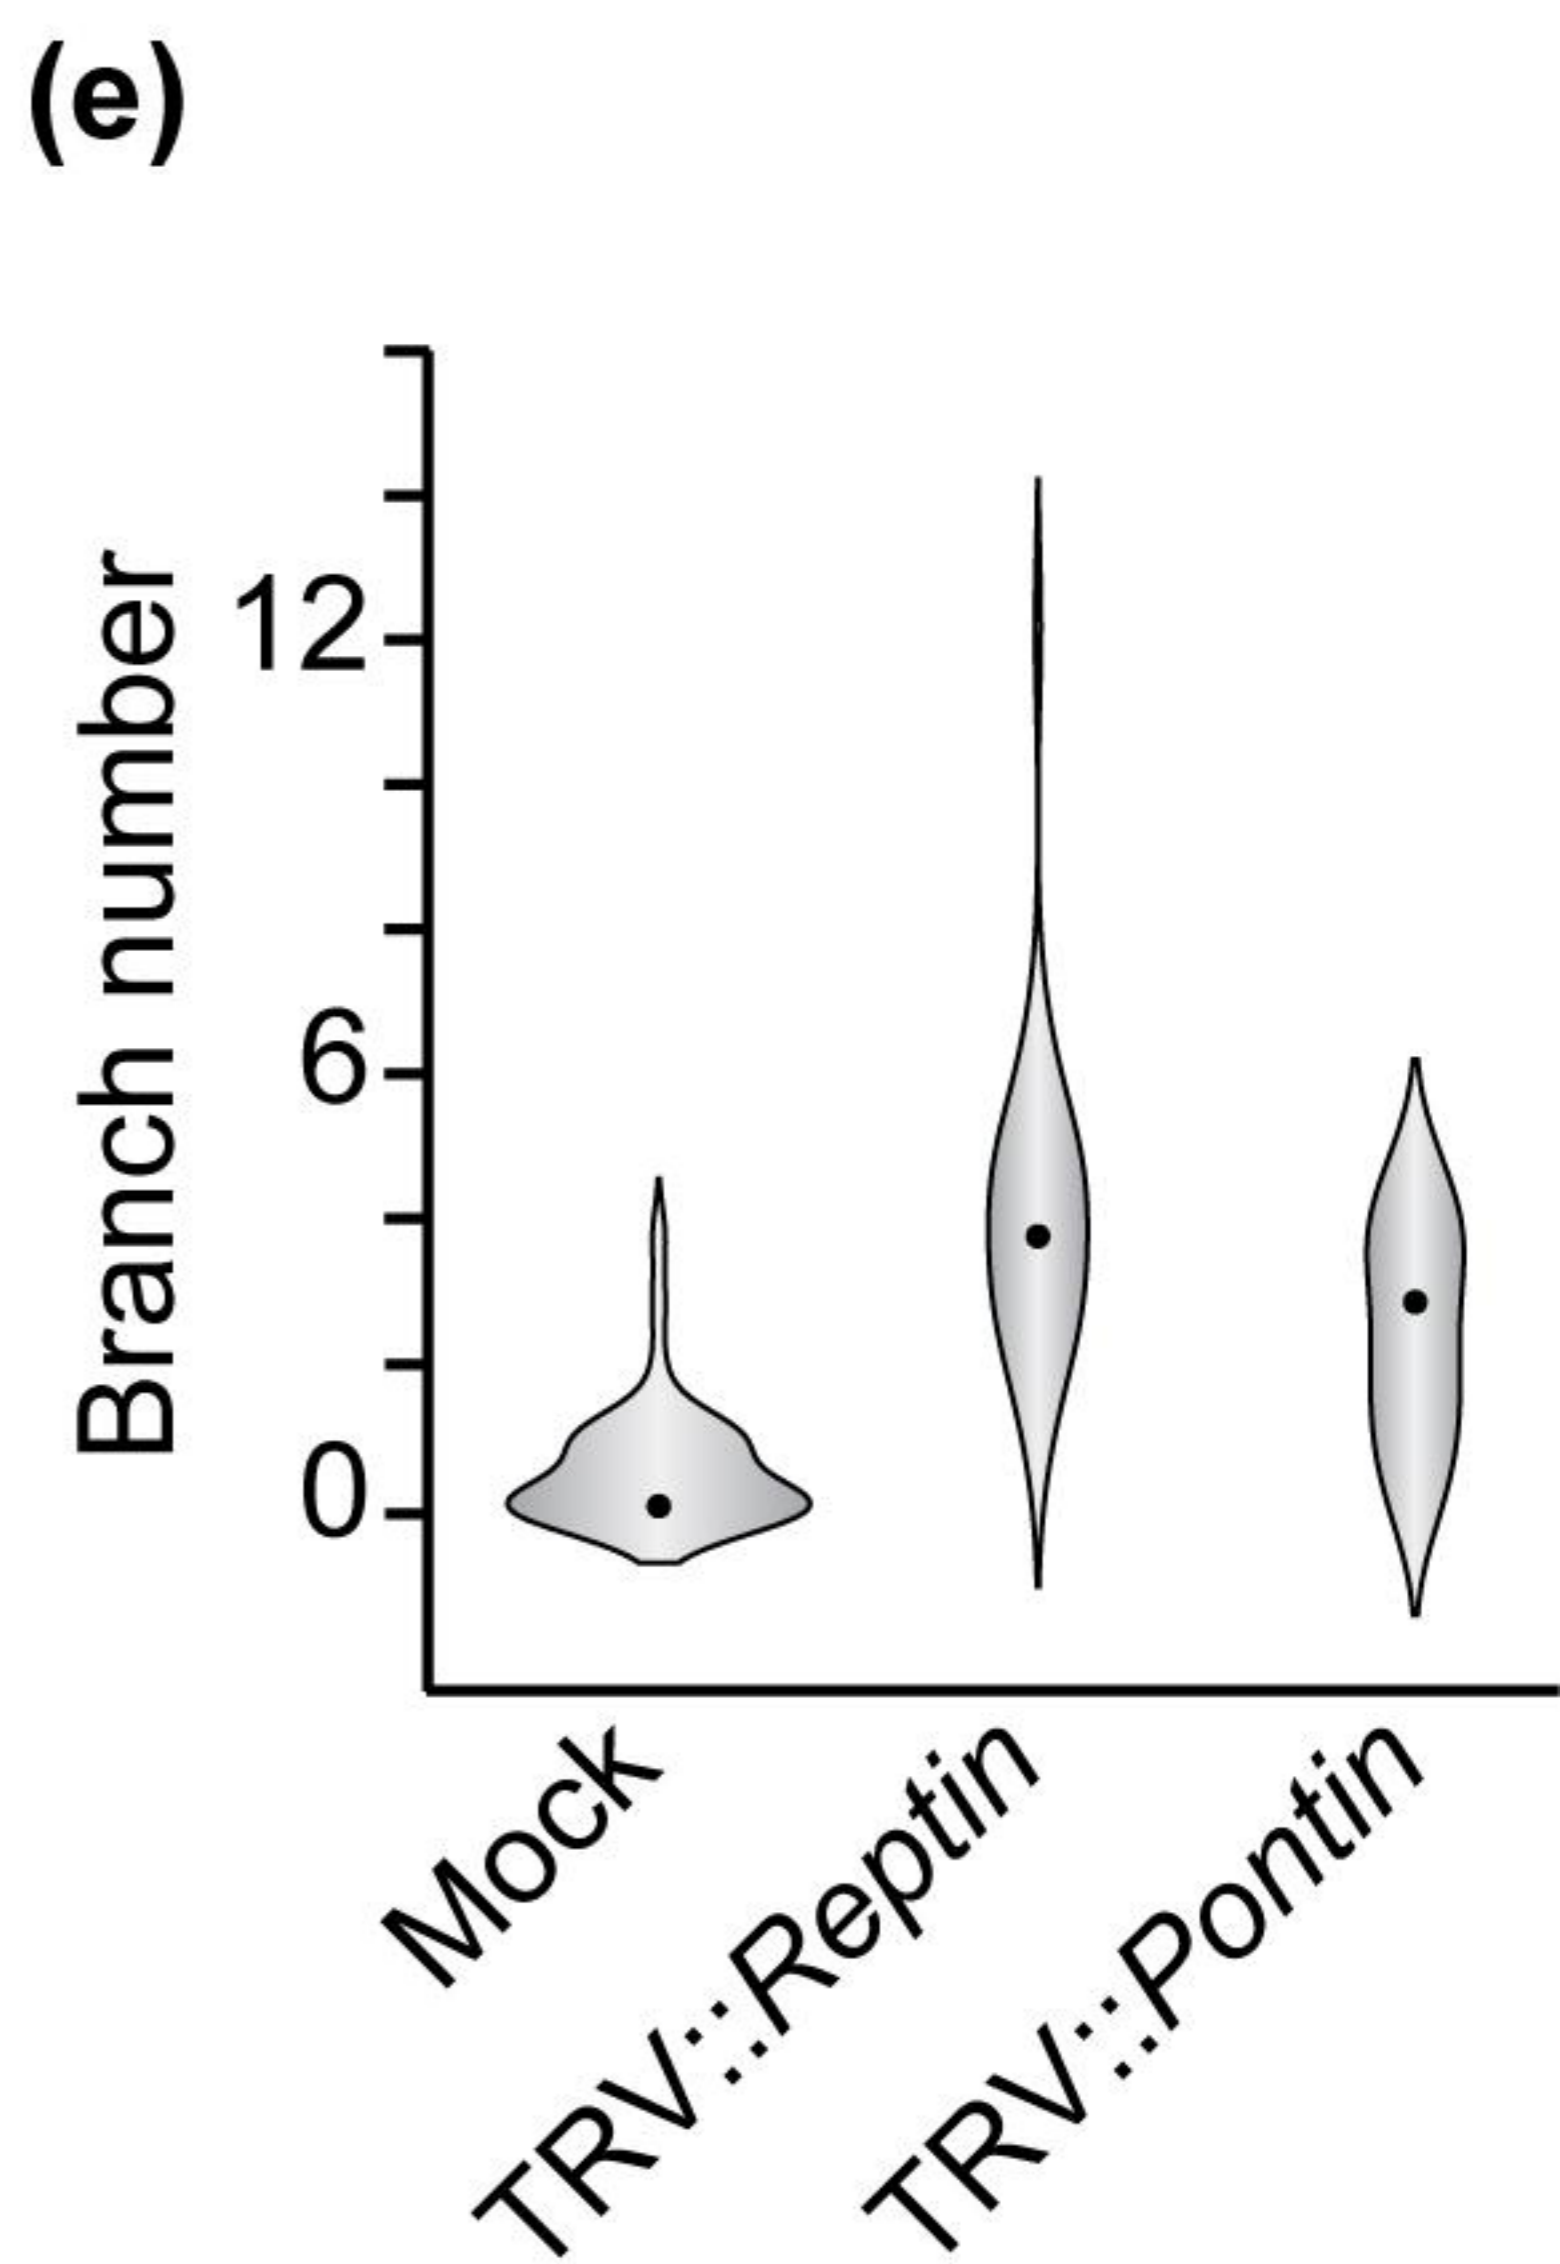



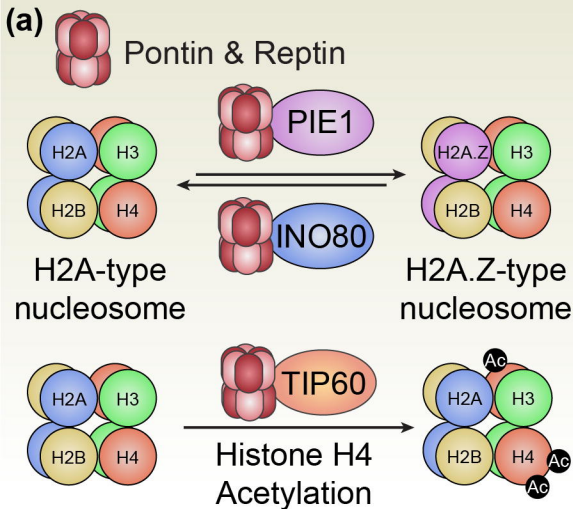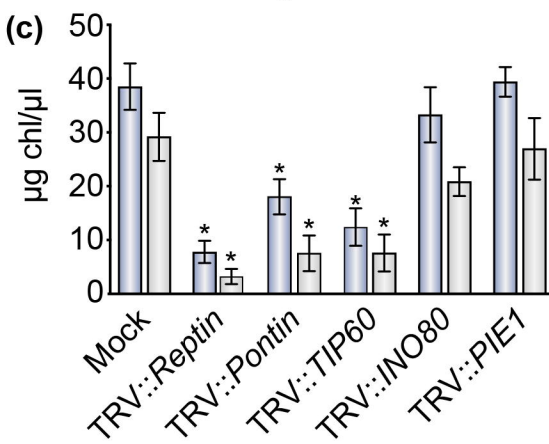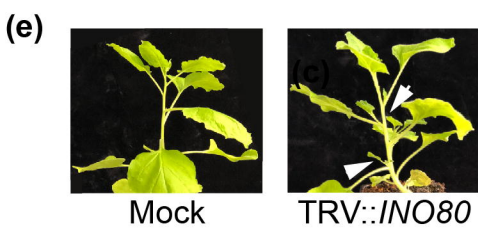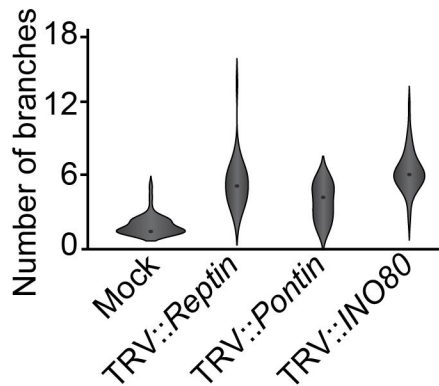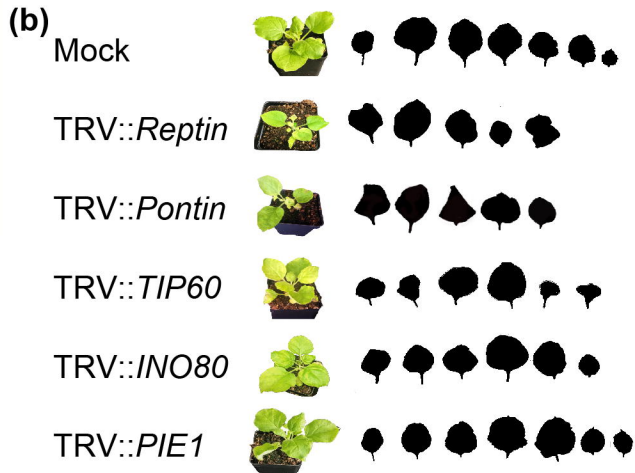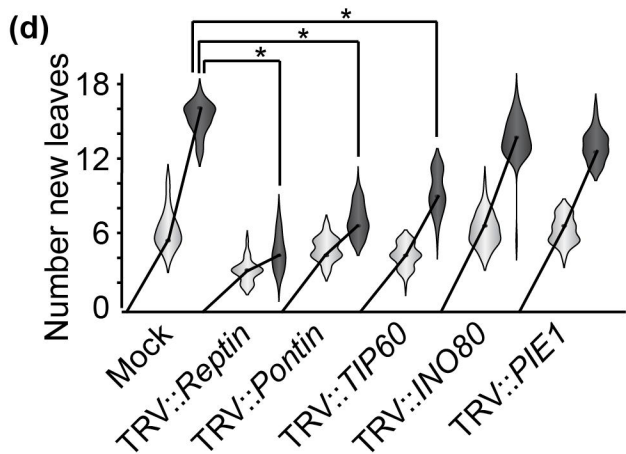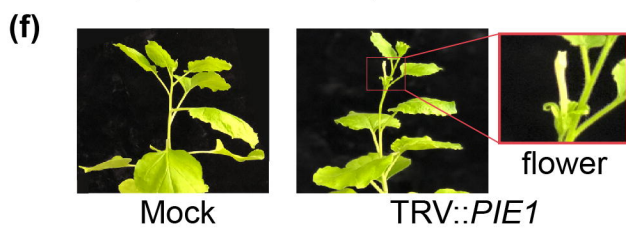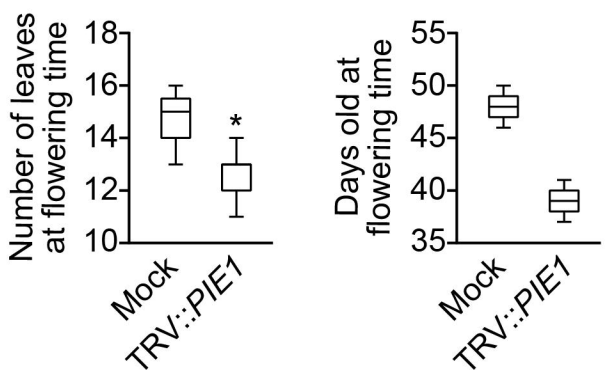

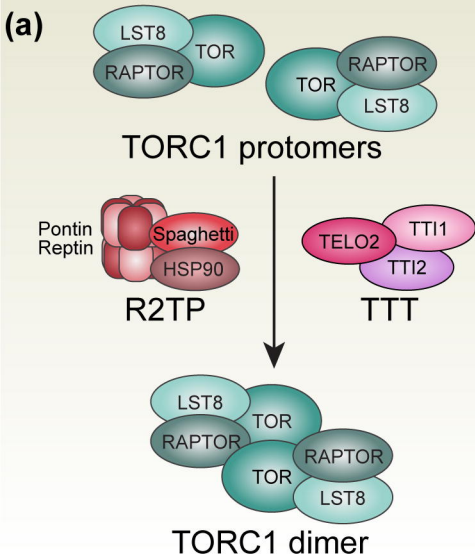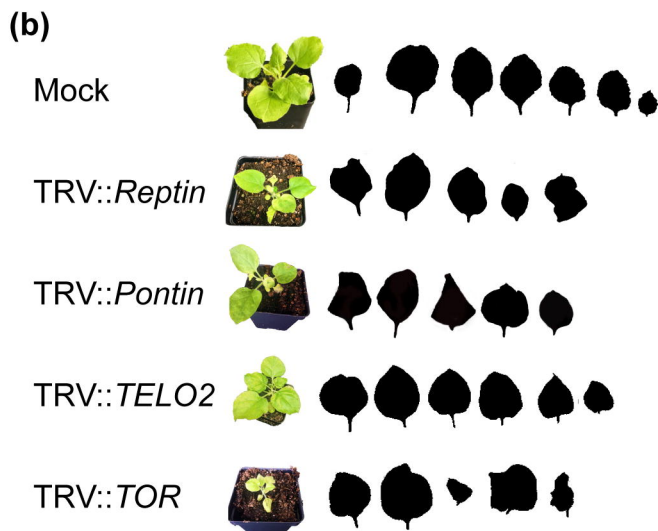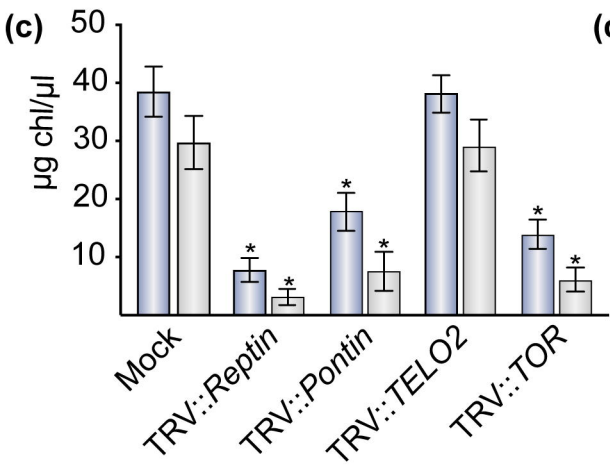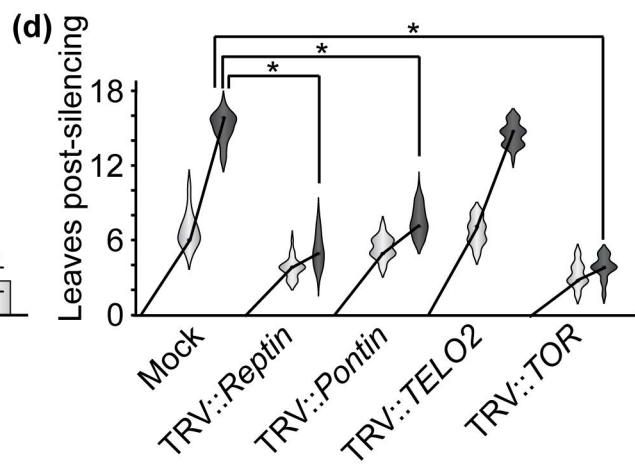

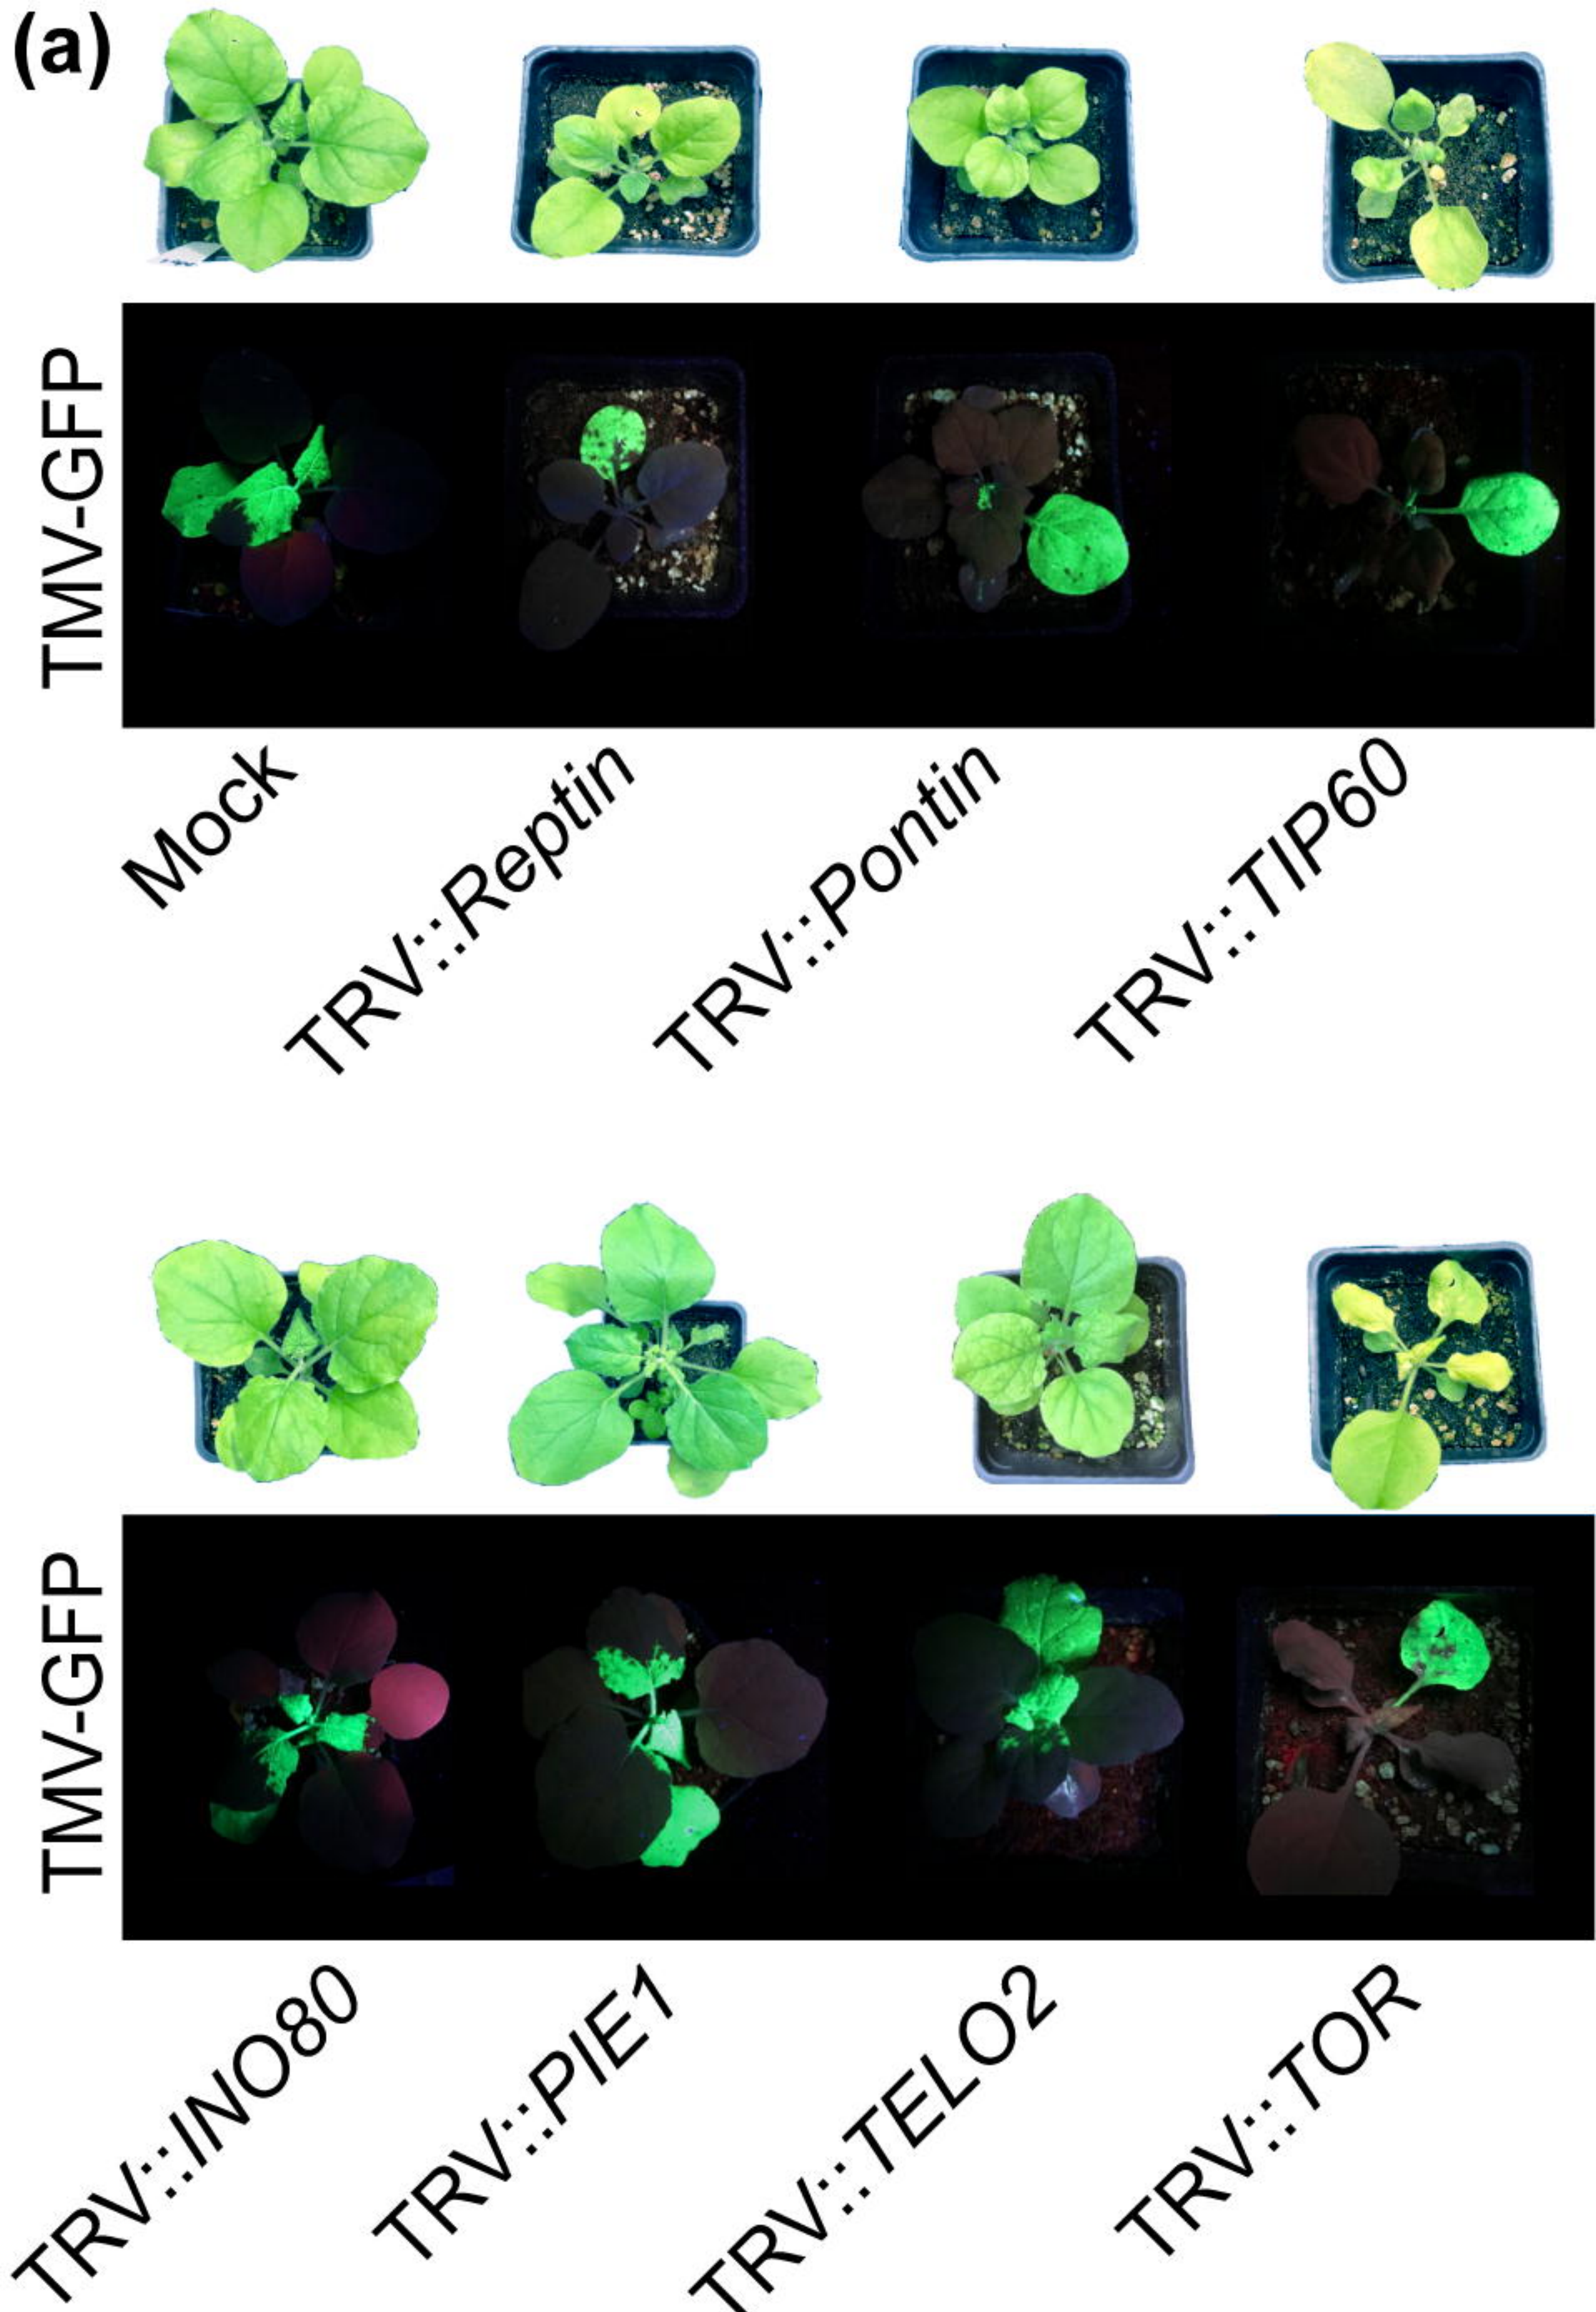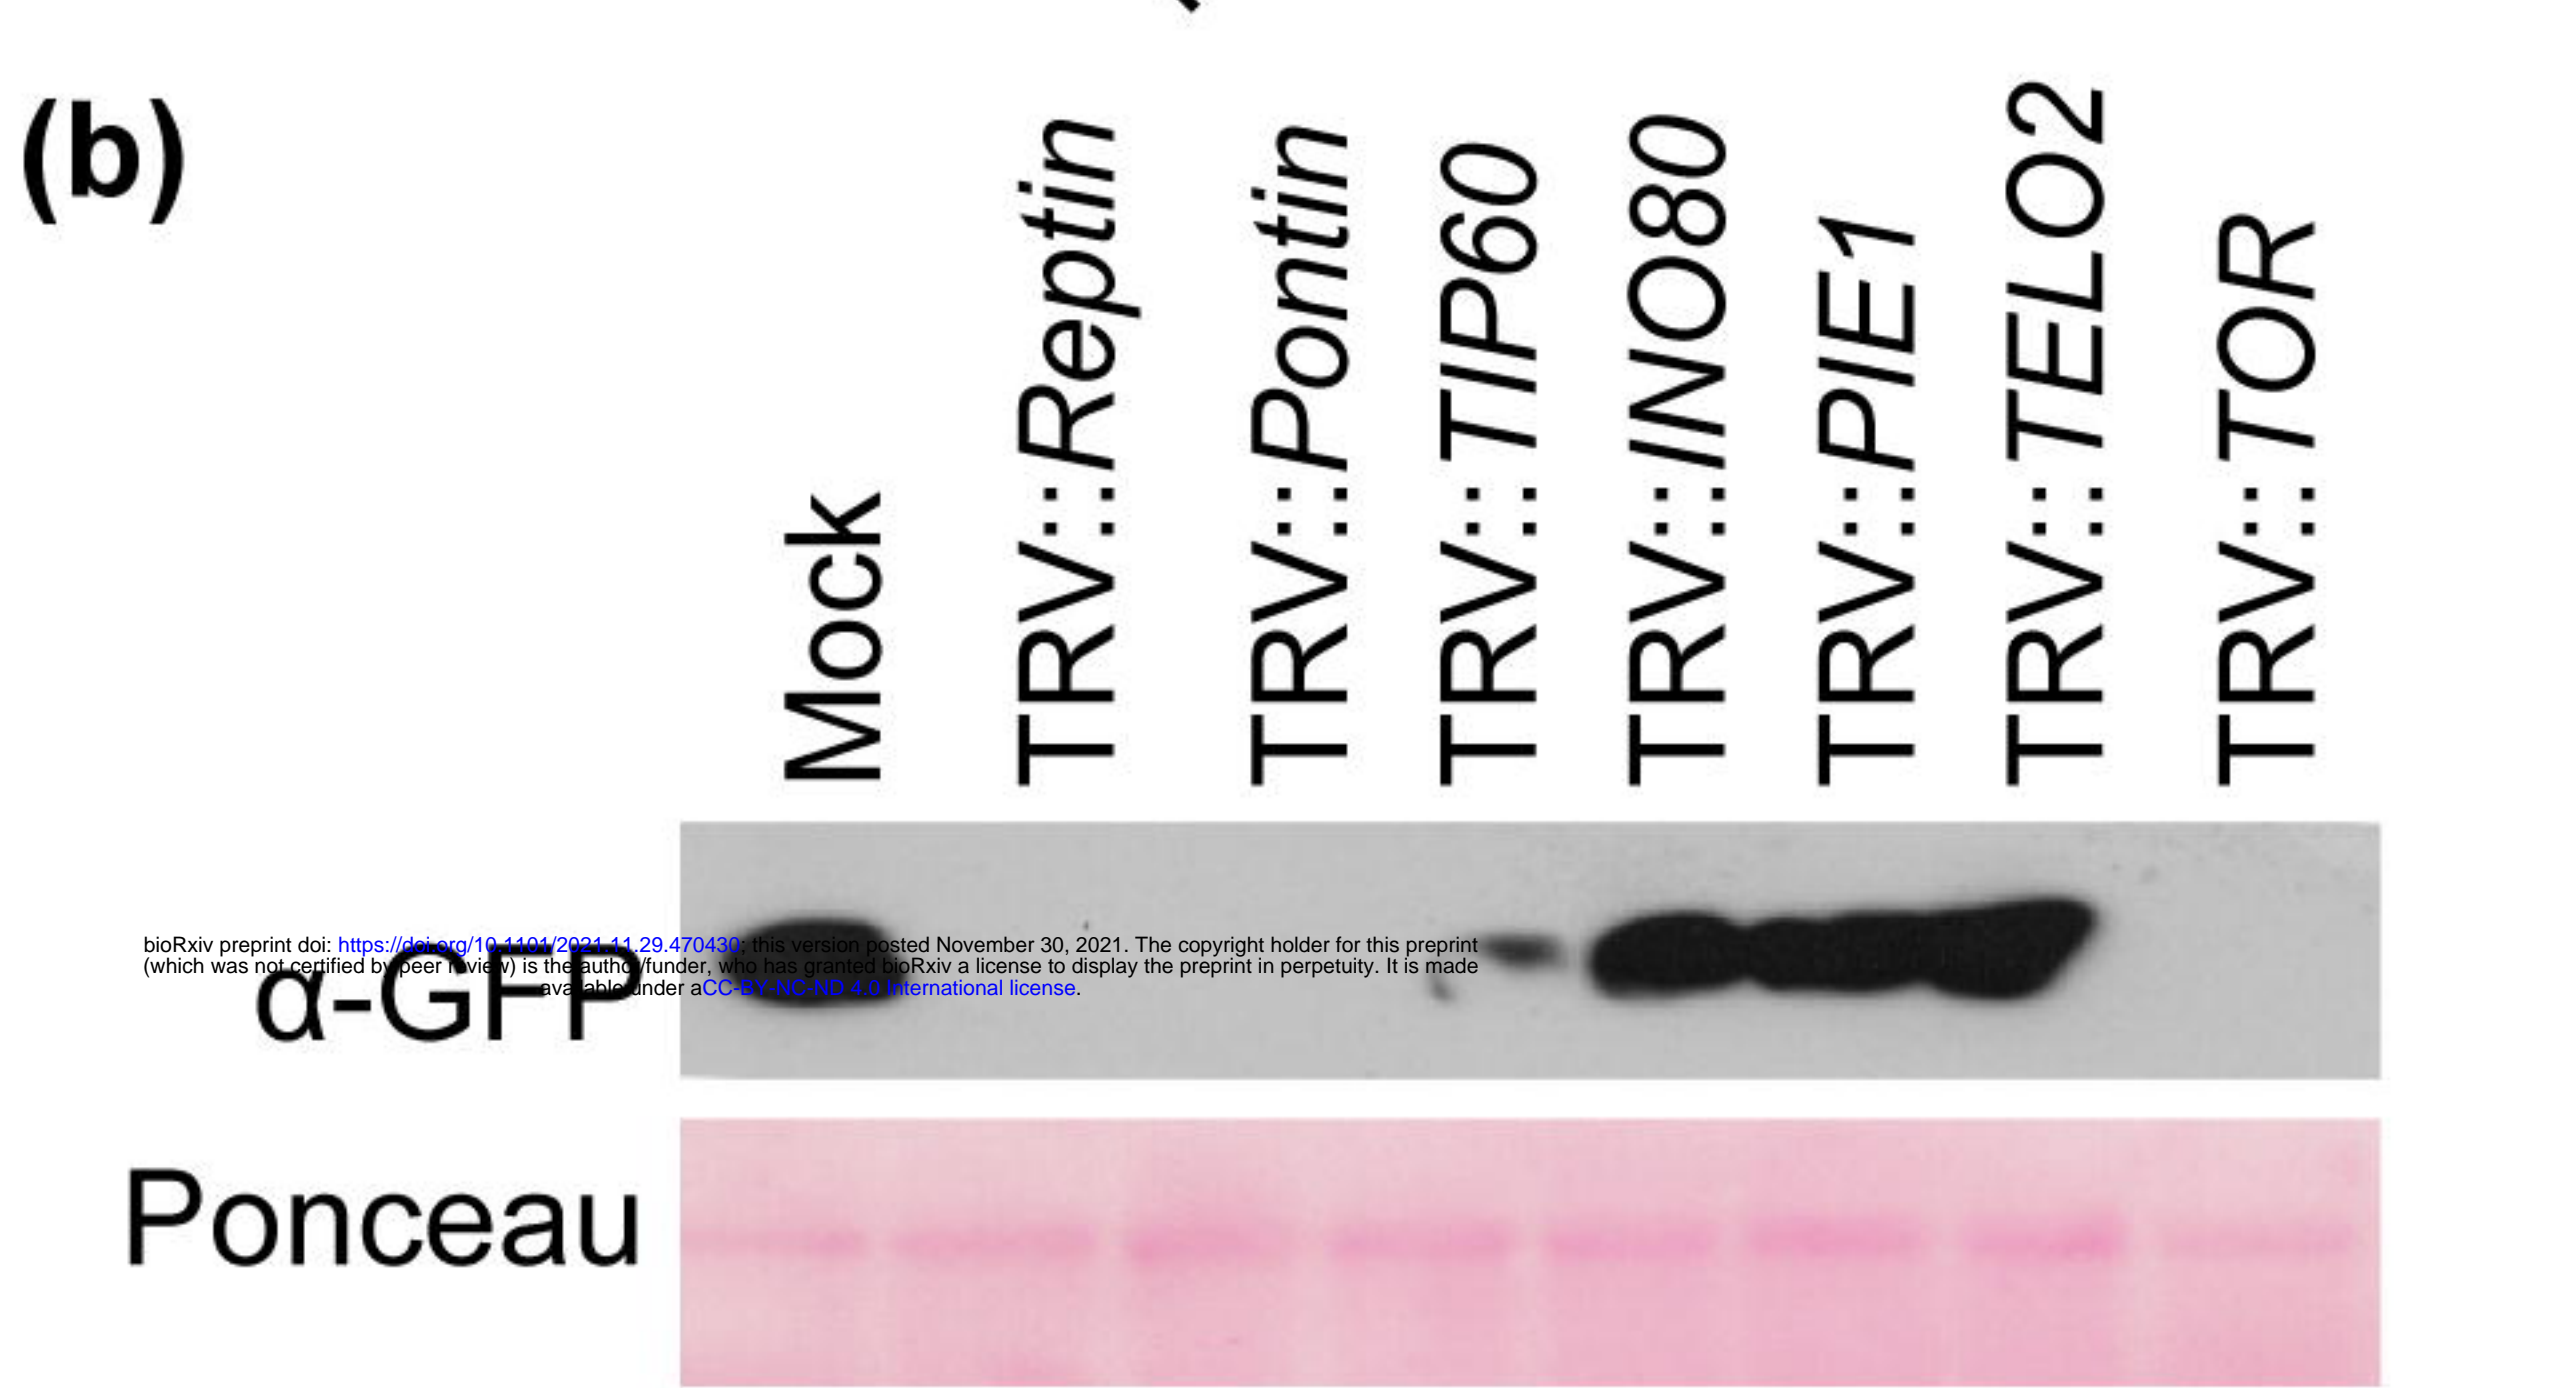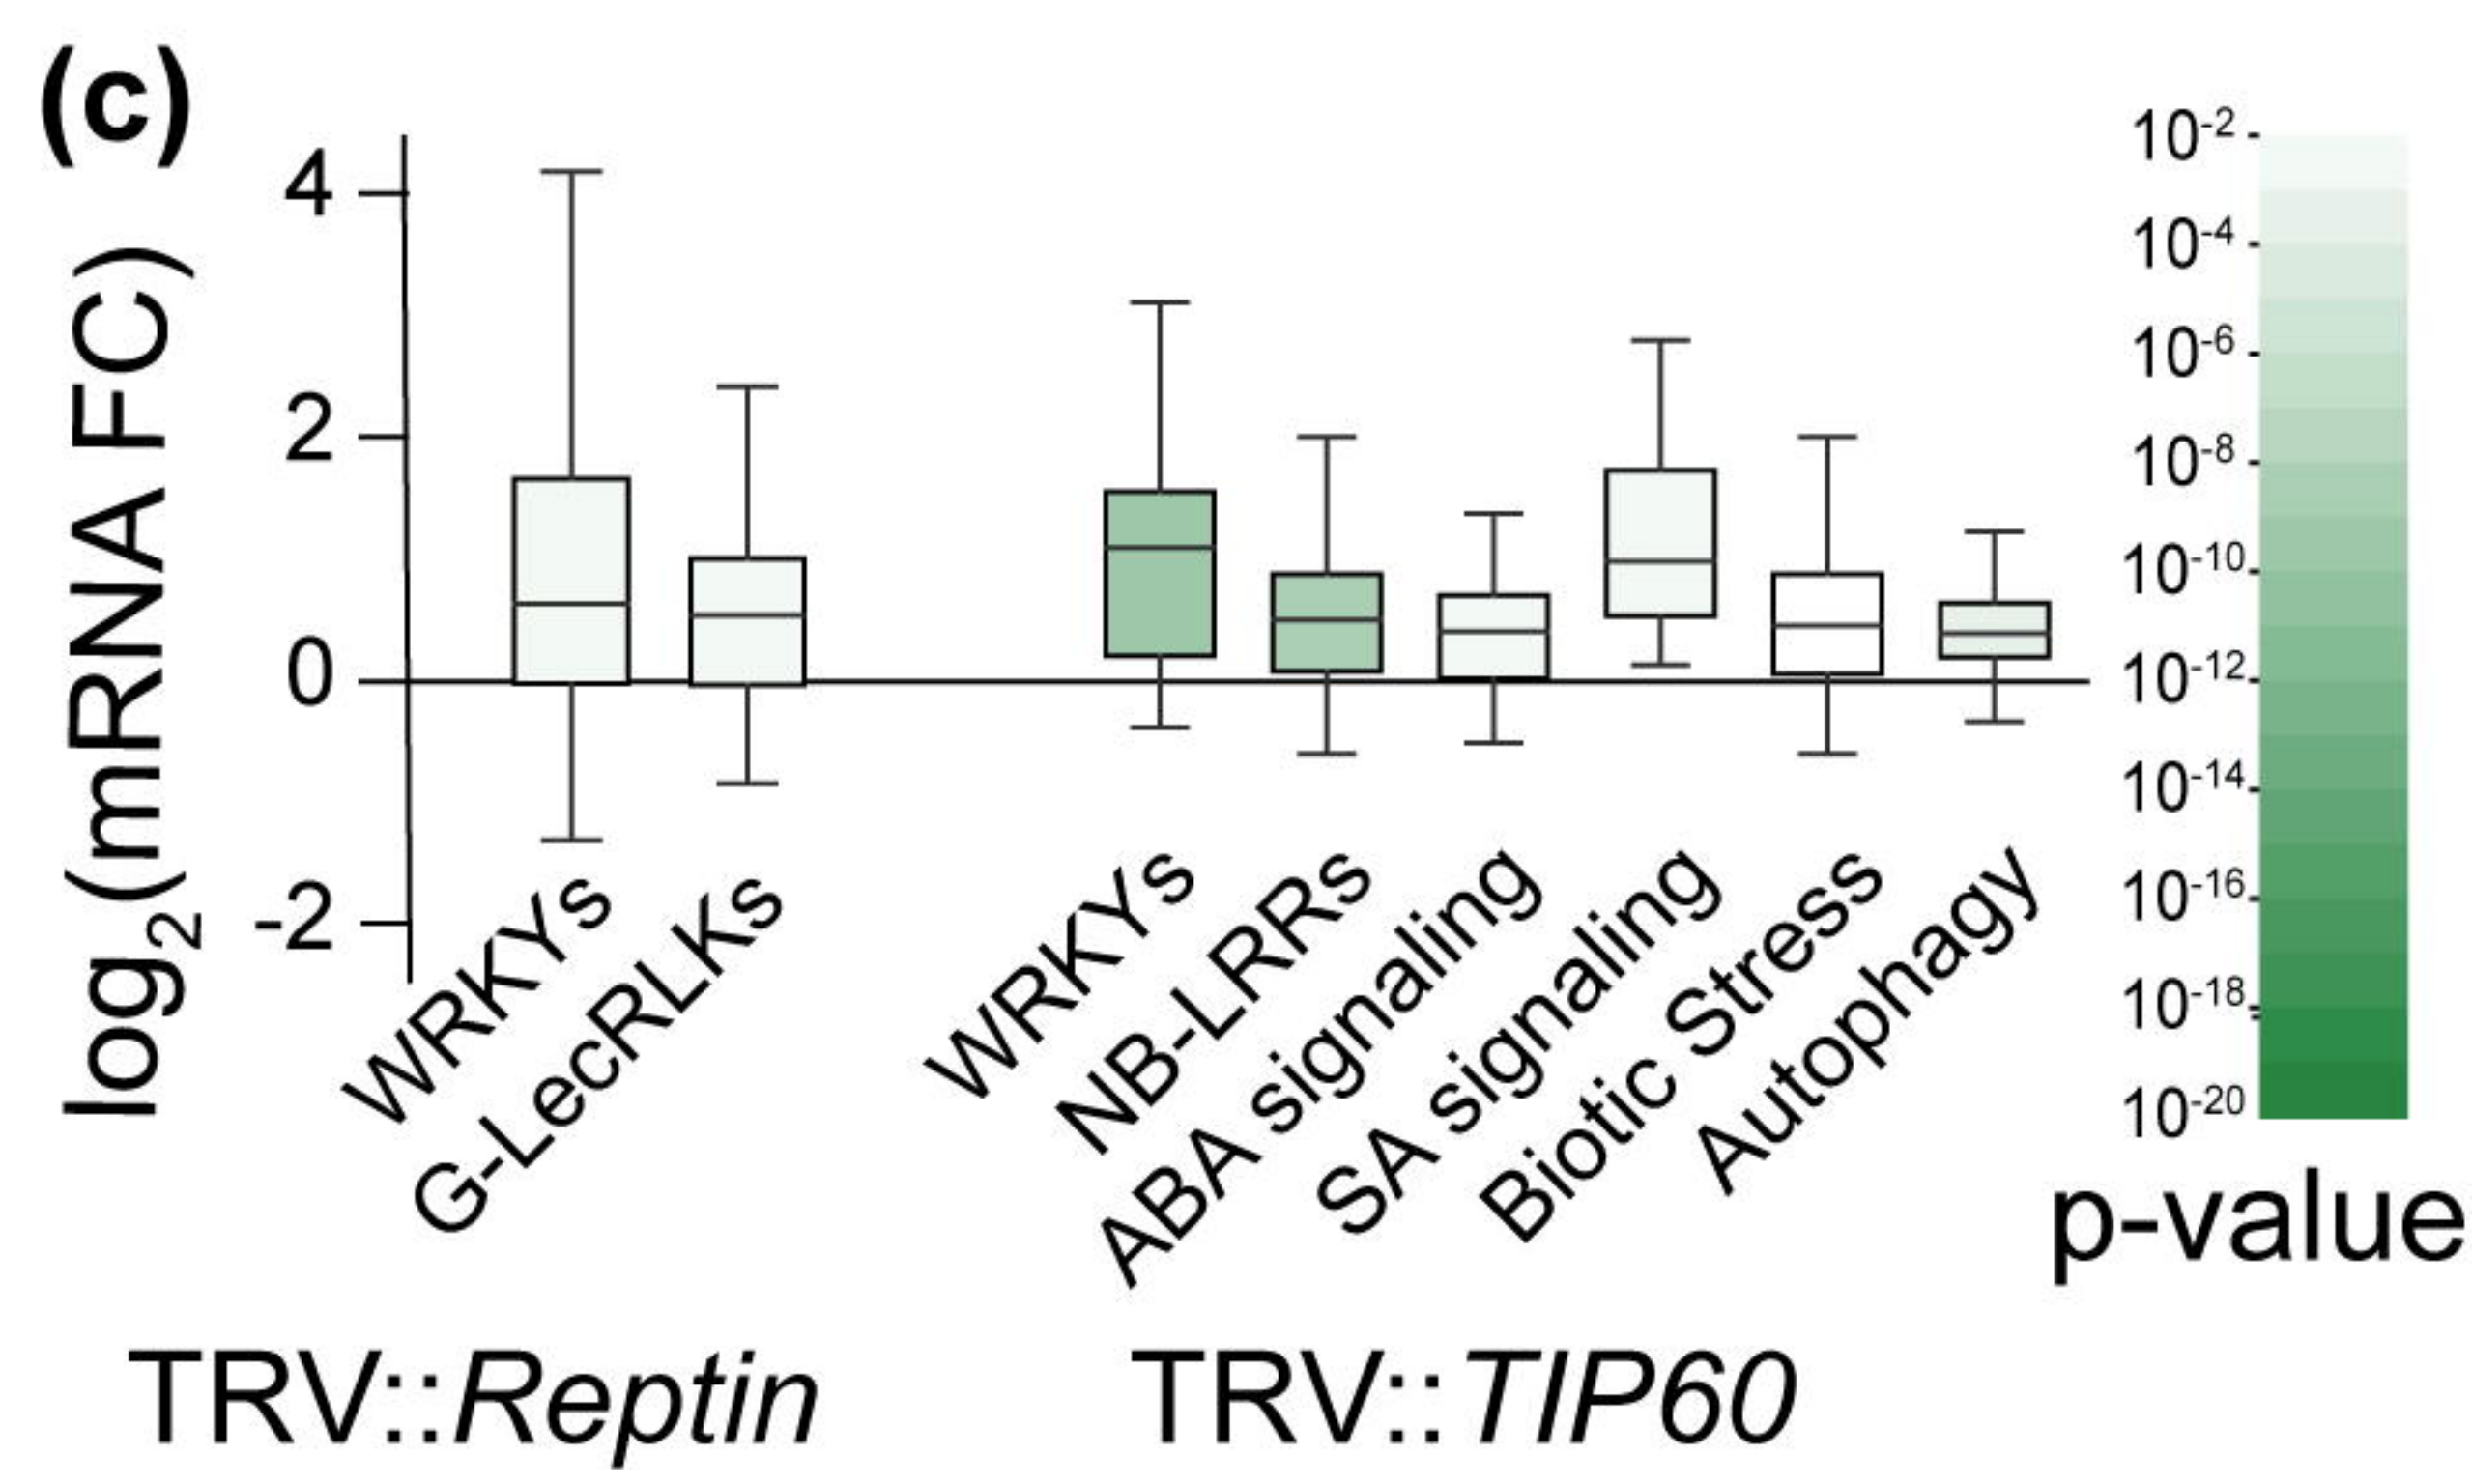

bioRxiv preprint doi: <https://doi.org/10.1101/2021.11.29.470430>; this version posted November 30, 2021. The copyright holder for this preprint (which was not certified by peer review) is the author/funder, who has granted bioRxiv a license to display the preprint in perpetuity. It is made available under aCC-BY-NC-ND 4.0 International license.
